# Supplementary material for: Influence of Genetic West African Ancestry on Metabolomics among Hypertensive Patients
Source: MDPI journal article supplement (doi:10.3390/metabo12090783), 2022-08-24
Supplement: s1 [file s1]

# Influence of Genetic West African Ancestry on Metabolomics among Hypertensive Patients

Mai Mehanna <sup>1</sup>, Caitrin W. McDonough <sup>1</sup>, Steven M. Smith <sup>1,2</sup>, Yan Gong <sup>1</sup>, John G. Gums <sup>1</sup>, Arlene B. Chapman <sup>3</sup>, Julie A. Johnson <sup>1</sup> and Rhonda M. Cooper-DeHoff <sup>1,\*</sup>

<sup>1</sup> Department of Pharmacotherapy and Translational Research and Center for Pharmacogenomics and Precision Medicine, College of Pharmacy, University of Florida, Gainesville, FL 32610, USA

<sup>2</sup> Department of Pharmaceutical Outcomes & Policy, College of Pharmacy, University of Florida, Gainesville, FL 32610, USA

<sup>3</sup> Department of Medicine, University of Chicago, Chicago, IL 60637, USA

\* Correspondence: dehoff@cop.ufl.edu; Tel.: +1-(352)-273-6184

## Running Head:

**Key Words:** African ancestry; metabolomics; hypertension; blood pressure.

**Clinical Trial Registry Numbers:** NCT01203852; NCT00246519

## Methods

### Study Design and Participants

#### The Pharmacogenomics Evaluation of Antihypertensive Responses (PEAR)

We used data from participants recruited as part of PEAR clinical trial in our screening and discovery phases. PEAR was a prospective, multicenter, randomized, open-label clinical trial, conducted at three US sites (University of Florida in Gainesville, FL; Mayo Clinic in Rochester, MN; and Emory University in Atlanta, GA) (clinicaltrials.gov identifier: NCT00246519). Details of this study have been previously described [1]. Participants with uncomplicated mild to moderate essential hypertension (HTN), of any race, aged 17–65 years old were recruited. Exclusion criteria were secondary HTN, systolic blood pressure (SBP) > 180 mmHg or diastolic BP (DBP) > 110 mmHg, isolated systolic HTN, cardiovascular disease, diabetes mellitus, heart rate < 55 beats/min, renal or hepatic dysfunction. Also, pregnant and lactating women were excluded. After a washout period of about four weeks of any antihypertensive drugs, participants were randomly assigned to either the  $\beta$ -blocker atenolol 50 mg once daily (dose titrated to 100 mg once daily if BP > 120/70 mmHg) or the thiazide diuretic hydrochlorothiazide (HCTZ) 12.5 mg once daily (dose titrated to 25 mg once daily if BP > 120/70 mmHg) for a total of 9 weeks. After monotherapy treatment, if BP remained above the goal, drug from the other treatment arm was added (i.e. HCTZ was added for those on atenolol, and vice versa), followed by the same dose titration for another 6–9 weeks of treatment.

#### PEAR-2

In the current study, we used data from participants recruited as part of PEAR-2 trial in our replication phase. PEAR-2 was a prospective, multicenter, open-label, sequential clinical trial,

conducted at the same US three sites mentioned above (clinicaltrials.gov identifier: NCT01203852). Details of this trial have been previously published [2]. Participants with uncomplicated mild to moderate essential HTN, of any race, aged 18–65 years old were recruited. PEAR-2 exclusion criteria were the same as described above for PEAR. After an average of four-week washout period of any antihypertensive medications, participants were initially treated with the  $\beta$ -blocker metoprolol 50 mg twice daily for two weeks, followed by a dose titration to 100 mg twice daily for an additional six weeks. After a second washout period, participants were then treated with the thiazide-like diuretic chlorthalidone 15 mg once daily, followed by a dose titration to 25 mg once daily for an additional six weeks.

### **Data Processing and Quality Control on PEAR Metabolomics Data**

A total of 1223 metabolites (971 known and 252 unknown) have been detected in PEAR plasma samples at baseline. The known classified metabolites included 351 lipids, 191 xenobiotics, 165 amino acids, 37 nucleotides, 34 peptides, 27 cofactors and vitamins, 26 carbohydrates, 8 energy metabolites and other 132 unclassified metabolites. We performed processing and quality control (QC) on PEAR metabolomics data using MetaboAnalyst 5.0 (an open-source R-based program for metabolomics) and Galaxy Southeast Center for Integrated Metabolomics (SECIM) tools [3,4]. Out of the 1223 metabolites, a total of 337 metabolites were excluded. First, all xenobiotics (n=191) were removed to reduce the environmental confounding effects on our findings. These included drugs' metabolites (n=86), food components (n=42), chemicals (n=21), metabolites involved in benzoate metabolism (n=21), metabolites involved in xanthine metabolism (n=16), tobacco metabolites (n=4) and bacterial/ fungal metabolite (n=1). Additionally, all metabolites with greater than 60% missing

data (n=146) were excluded. Non-imputed data of the remaining 886 metabolites were included in the QC steps and in the main analysis. Imputation using the K-nearest neighbors algorithm was conducted only to perform principal component analysis (PCA) as one of the QC steps. The main objective of QC was to identify and flag outlying participants (based on the metabolomics data) and outlying metabolites. The QC steps are illustrated in detail below.

### **PCA**

The first ten principal components (PCs) explain a total of about 86% of the variability in PEAR metabolomics data. Based on the first three PCs which explain a total of 68%, there was no clustering among PEAR participants. Also, there was no clustering by sex, age group, body mass index (BMI) group, batch, or recruitment site (data not shown). However, four outliers have been identified (flagged) (**Figure S3**), and a sensitivity analysis (screening phase) was conducted excluding them.

### **Standard Euclidean Distance (SED)**

SED was used to identify the outlying participants based on their metabolic states. SED between each participant and the estimated mean was calculated. A total of 23 participants had the largest SED values and were considered outliers based on their metabolic states. These participants were flagged, and a sensitivity analysis (screening phase) was conducted excluding them.

### **Bland-Altman (BA)**

The BA assesses concordance of the metabolomics data between pairs of participants within specified subgroups [5]. The expectation is that participants within the same subgroup have similar metabolic states. To conduct this QC step, PEAR participants were categorized into the following eight subgroups: male participants aged < 50 years old with BMI < 30 kg/m<sup>2</sup> (n=66), male participants

aged < 50 years old with BMI  $\geq 30$  kg/m<sup>2</sup> (n=82), male participants aged  $\geq 50$  years old with BMI < 30 kg/m<sup>2</sup> (n=88), male participants aged  $\geq 50$  years old with BMI  $\geq 30$  kg/m<sup>2</sup> (n=69), female participants aged < 50 years old with BMI < 30 kg/m<sup>2</sup> (n=66), female participants aged < 50 years old with BMI  $\geq 30$  kg/m<sup>2</sup> (n=97), female participants aged  $\geq 50$  years old with BMI < 30 kg/m<sup>2</sup> (n=89), female participants aged  $\geq 50$  years old with BMI  $\geq 30$  kg/m<sup>2</sup> (n=76). Participant was flagged if greater than 20% of the metabolites for that participant were also flagged as outliers. Metabolite was flagged if greater than 5% of the participants' values for that metabolite were also flagged as outliers. Outliers were identified using Pearson residuals, DFFITS and Cooks D. Based on these measures and on the BA plots, no participants were flagged, whereas a total of 24 metabolites were flagged (**Table S1**). Within the replicated clusters, sphingomyelin (d18:1/24:1, d18:2/24:0)\* from the sphingolipid metabolism & ceramides cluster as well as arginine and proline from the urea cycle-arginine-proline metabolism cluster were flagged by the BA method in PEAR (**Table S1**). However, a further investigation )indicated that none of these three metabolites were flagged in PEAR-2.

### Coefficient of Variation (CV)

CV for each metabolite was calculated by dividing standard deviation (SD) by the mean, to assess the variability of each metabolite across PEAR participants. The larger the metabolite's CV value, the higher is variability of that metabolite. The top 10% of the metabolites with the largest CV values (exceeding the CV cutoff of 0.778, n=36) were flagged (**Table S2**).

Within the replicated clusters, 1-methylnicotinamide, pyridoxate and trigonelline from the cofactors and vitamins cluster were flagged by the CV QC step in PEAR (**Table S2**). A further investigation showed that 1-methylnicotinamide and trigonelline had also large CV values in PEAR-2. However,

sensitivity analyses on these two metabolites (excluding the outlying participants) generated similar estimates and false discovery rates to that shown in **Table S5**.

## References:

1. Johnson JA, Boerwinkle E, Zineh I, Chapman AB, Bailey K, Cooper-DeHoff RM, et al. Pharmacogenomics of antihypertensive drugs: rationale and design of the Pharmacogenomic Evaluation of Antihypertensive Responses (PEAR) study. *Am Heart J*. 2009;157(3):442-9.
2. Mehanna M, Gong Y, McDonough CW, Beitelshes AL, Gums JG, Chapman AB, et al. Blood pressure response to metoprolol and chlorthalidone in European and African Americans with hypertension. *J Clin Hypertens (Greenwich)*. 2017;19(12):1301-8.
3. Pang Z, Chong J, Zhou G, de Lima Morais DA, Chang L, Barrette M, et al. MetaboAnalyst 5.0: narrowing the gap between raw spectra and functional insights. *Nucleic Acids Res*. 2021;49(W1):W388-W96.
4. Afgan E, Baker D, Batut B, van den Beek M, Bouvier D, Cech M, et al. The Galaxy platform for accessible, reproducible and collaborative biomedical analyses: 2018 update. *Nucleic Acids Res*. 2018;46(W1):W537-W44.
5. Bland JM, Altman DG. Statistical methods for assessing agreement between two methods of clinical measurement. *Lancet*. 1986;1(8476):307-10.
6. Kazmi N, Elliott HR, Burrows K, Tillin T, Hughes AD, Chaturvedi N, et al. Associations between high blood pressure and DNA methylation. *PLoS One*. 2020;15(1):e0227728.

**Figure S1.** Diagrams showing participants included in this study.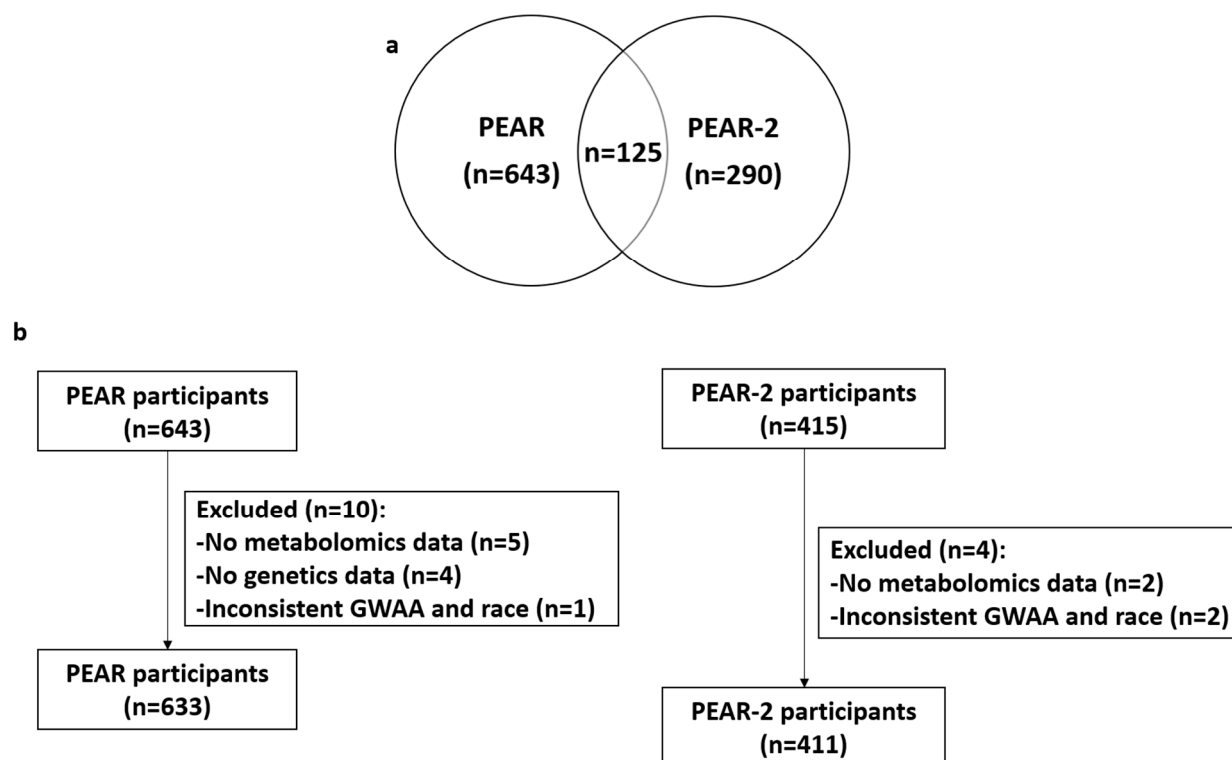

**Figure S1a** Venn diagram showing the overlapping participants who were enrolled in both PEAR and PEAR-2 trials (n=125). **Figure S1b** Consort diagrams showing PEAR and PEAR-2 participants included in this study. One participant from PEAR and two participants from PEAR-2 were excluded because they had inconsistent data for GWAA and race (identified by principal component analysis) (these participants were blacks with GWAA <45%). Abbreviations: PEAR, Pharmacogenomic Evaluation of Antihypertensive Responses; GWAA, Genetic West African ancestry.



**Figure S2. Distributions of GWAA proportion among PEAR and PEAR-2 participants with GWAA < 45% and those with GWAA ≥ 45%**

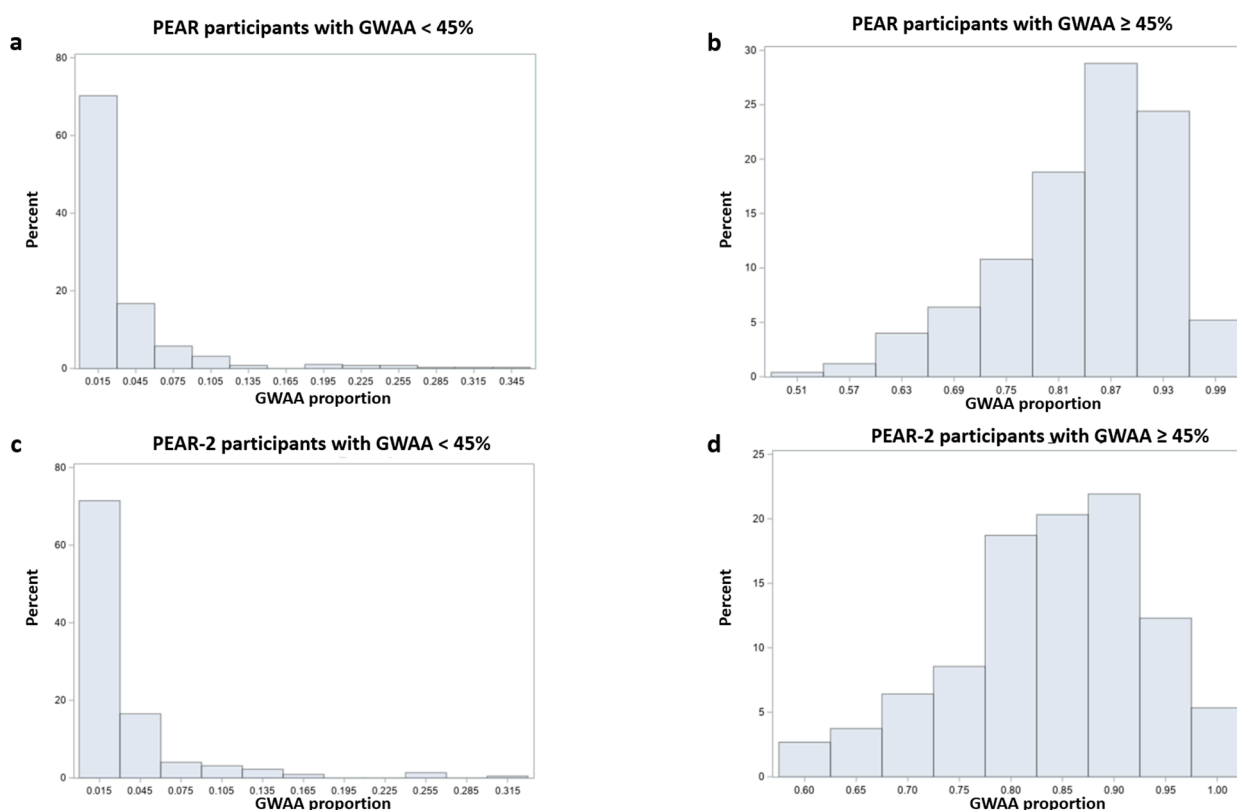

**Figure S2a** Histogram showing the distribution of GWAA proportion among PEAR participants with GWAA < 45% (n=383) (median 1.6%, IQR 1 – 3.4%; minimum 0.4%, maximum 34.6%). These participants included the following self-reported racial groups: White (n=371), Asian (n=7) and other (n=5). **Figure S2b** Histogram showing the distribution of GWAA proportion among PEAR participants with GWAA ≥ 45% (n=250) (median 85.4%, IQR 78.8 – 90.6%; minimum 48.4%, maximum 99.6%). These participants included the following self-reported racial groups: Black (n=242), White (n=1) and other (n=7). **Figure S2c** Histogram showing the distribution of GWAA proportion among PEAR-2 participants with GWAA < 45% (n=224) (median 1.5%, IQR 0.9 – 3.6%; minimum 0.4%, maximum 31.3%). These participants included the following self-reported racial groups: White (n=220), Asian (n=2) and other (n=2). **Figure S2d** Histogram showing the distribution of GWAA proportion among PEAR-2 participants with GWAA ≥ 45% (n=187) (median 84.8%, IQR 79.2 – 90.5%; minimum 59.3%, maximum 99.5%). These participants included the following self-reported racial groups: Black (n=185), and other (n=2).

Abbreviations: PEAR, Pharmacogenomic Evaluation of Antihypertensive Responses; GWAA, Genetic West African ancestry; IQR, interquartile range.

**Figure S3.** PCA scatter plots showing clustering of PEAR participants (n=633) based on the first three PCs

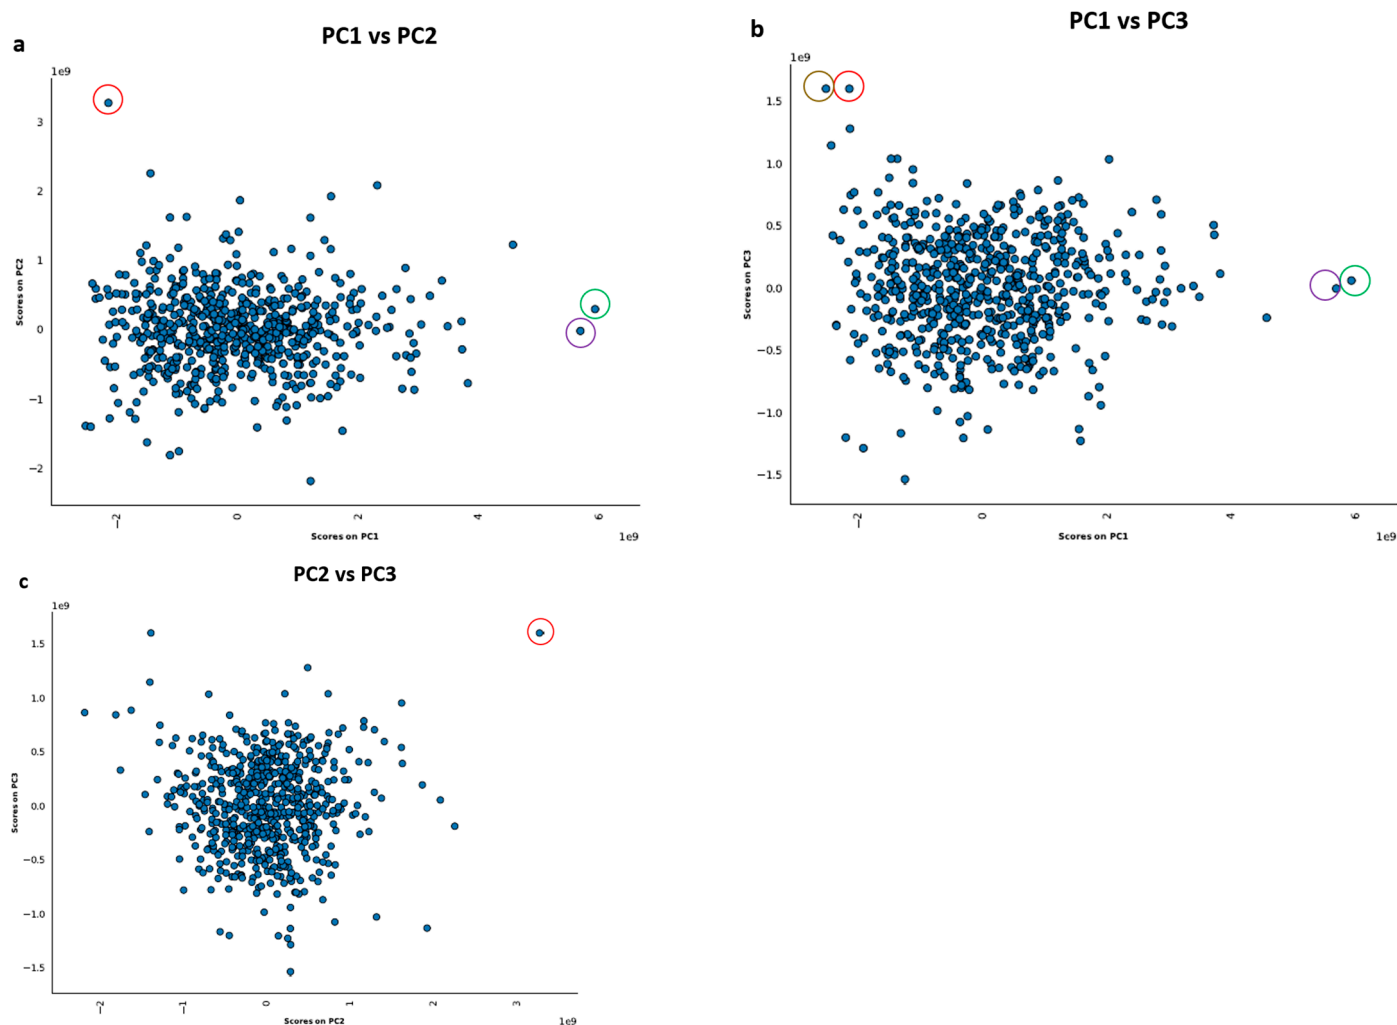

PCA scatter plots showing clustering of PEAR participants (n=633) based on a) PC1 vs. PC2, b) PC1 vs. PC3 and c) PC2 vs. PC3. PC1, PC2 and PC3 explain 50.5%, 11.2% and 6.1% of variability in the metabolomics data, respectively. Scatterplots show four outlying participants based on their metabolomics data (red, green, purple and brown circles). Abbreviations: PCA, principal component analysis; PEAR, Pharmacogenomic Evaluation of Antihypertensive Responses; PC, principal component.

**Figure S4. Partial least-squares discriminant analysis (PLS-DA) of the 886 plasma metabolites in PEAR participants with GWAA < 45% (n=383) and PEAR participants with GWAA ≥ 45% (n=250)**

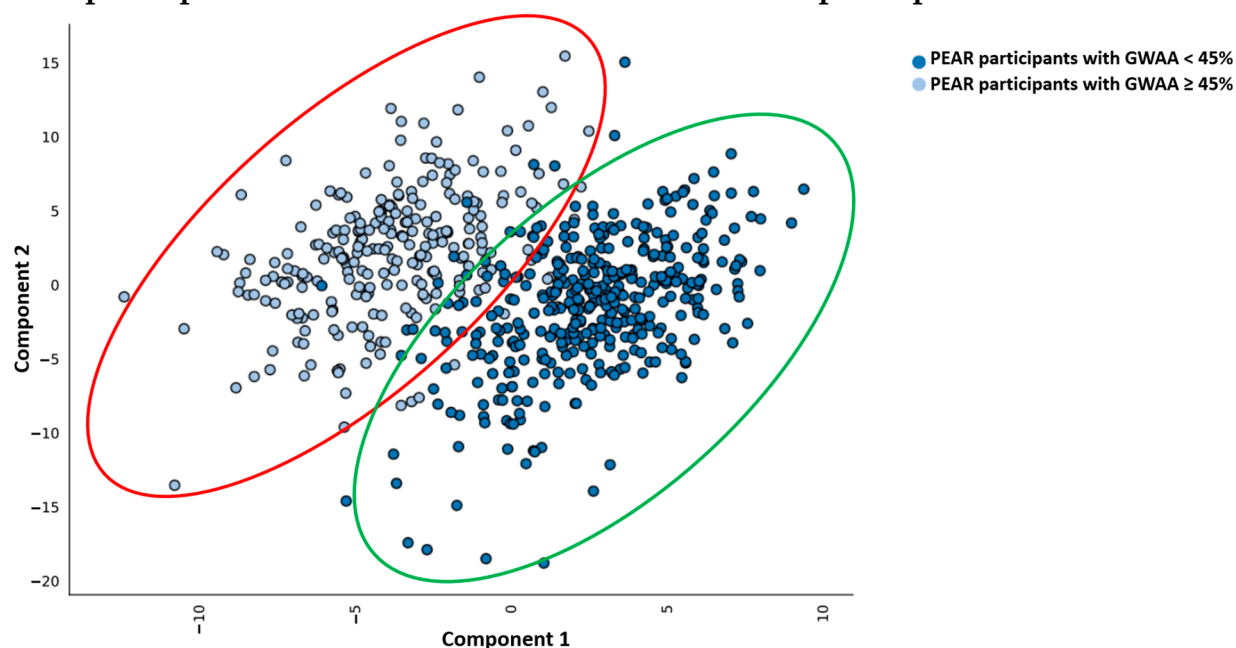

Two-dimensional score plot of PLS-DA model showing how the 886 plasma metabolites detected at baseline can discriminate the PEAR hypertensive participants with GWAA < 45% and PEAR hypertensive participants with GWAA ≥ 45%. Red circle indicates PEAR hypertensive participants with GWAA < 45%, while green circle indicates PEAR hypertensive participants with GWAA ≥ 45%.

Abbreviations: PEAR, Pharmacogenomic Evaluation of Antihypertensive Responses; GWAA, Genetic West African Ancestry.

**Table S1. Metabolites flagged by the BA measures and plots in PEAR (n=24)**

| Metabolite                                     | Classification <sup>0</sup> | Pathway                                              |
|------------------------------------------------|-----------------------------|------------------------------------------------------|
| 1-palmitoyl-2-arachidonoyl-GPC (16:0/20:4n6)   | Lipid                       | Phosphatidylcholine (PC)                             |
| 1-palmitoyl-2-linoleoyl-GPC (16:0/18:2)        | Lipid                       | Phosphatidylcholine (PC)                             |
| 1-palmitoyl-2-oleoyl-GPC (16:0/18:1)           | Lipid                       | Phosphatidylcholine (PC)                             |
| 1-palmitoyl-GPC (16:0)                         | Lipid                       | Lysophospholipid                                     |
| 1-stearoyl-2-linoleoyl-GPC (18:0/18:2)*        | Lipid                       | Phosphatidylcholine (PC)                             |
| <u>Arginine</u>                                | Amino Acid                  | Urea cycle; Arginine and Proline Metabolism          |
| Betaine                                        | Amino Acid                  | Glycine, Serine and Threonine Metabolism             |
| Carnitine                                      | Lipid                       | Carnitine Metabolism                                 |
| Creatine                                       | Amino Acid                  | Creatine Metabolism                                  |
| Creatinine                                     | Amino Acid                  | Creatine Metabolism                                  |
| Glucose                                        | Carbohydrate                | Glycolysis, Gluconeogenesis, and Pyruvate Metabolism |
| Glutamate                                      | Amino Acid                  | Glutamate Metabolism                                 |
| Glutamine                                      | Amino Acid                  | Glutamate Metabolism                                 |
| Isoleucine                                     | Amnio Acid                  | Leucine, Isoleucine and Valine Metabolism            |
| Leucine                                        | Amnio Acid                  | Leucine, Isoleucine and Valine Metabolism            |
| linoleate (18:2n6)                             | Lipid                       | Polyunsaturated Fatty Acid (n3 and n6)               |
| Lysine                                         | Amino Acid                  | Lysine Metabolism                                    |
| oleate/vaccenate (18:1)                        | Lipid                       | Long Chain Fatty Acid                                |
| palmitate (16:0)                               | Lipid                       | Long Chain Fatty Acid                                |
| Phenylalanine                                  | Amino Acid                  | Phenylalanine Metabolism                             |
| <u>Proline</u>                                 | Amino Acid                  | Urea cycle; Arginine and Proline Metabolism          |
| <u>sphingomyelin (d18:1/24:1, d18:2/24:0)*</u> | Lipid                       | Sphingolipid Metabolism                              |
| stearate (18:0)                                | Lipid                       | Long Chain Fatty Acid                                |
| X - 24803                                      | NA                          | NA                                                   |

\* Indicates compounds that have not been officially confirmed based on a standard, but we are confident in its identity

<sup>0</sup> Metabolites were classified based on the Human Metabolome Database superclass classification <http://www.hmdb.ca/classification>

The underlined metabolites are those included within the replicated metabolic clusters.

Abbreviations: BA, Bland-Altman; NA, not applicable.

**Table S2. The top 10% of metabolites with the largest CV values in PEAR (n=36)**

| Metabolite                                           | Classification <sup>0</sup> | Pathway                                     |
|------------------------------------------------------|-----------------------------|---------------------------------------------|
| 16a-hydroxy DHEA 3-sulfate                           | Lipid                       | Steroid                                     |
| <u>1-methylnicotinamide</u>                          | Cofactors and Vitamins      | Nicotinate and Nicotinamide Metabolism      |
| 2-hydroxy-3-methylvalerate                           | Amino Acid                  | Leucine, Isoleucine and Valine Metabolism   |
| 3-carboxy-4-methyl-5-propyl-2-furanpropanoate (CMPF) | Lipid                       | Fatty Acid, Dicarboxylate                   |
| 3-hydroxybutyrate (BHBA)                             | Lipid                       | Ketone Bodies                               |
| 3-methylhistidine                                    | Amino Acid                  | Histidine Metabolism                        |
| alpha-hydroxyisovalerate                             | Amino Acid                  | Leucine, Isoleucine and Valine Metabolism   |
| adenosine 5'-monophosphate (AMP)                     | Nucleotide                  | Purine Metabolism, Adenine containing       |
| androstenediol (3beta,17beta) disulfate (1)          | Lipid                       | Steroid                                     |
| arabitol/xylitol                                     | Carbohydrate                | Pentose Metabolism                          |
| bilirubin (E,E)*                                     | Cofactors and Vitamins      | Hemoglobin and Porphyrin Metabolism         |
| erucate (22:1n9)                                     | Lipid                       | Long Chain Fatty Acid                       |
| gamma-glutamylglycine                                | Peptide                     | Gamma-glutamyl Amino Acid                   |
| Glycochenodeoxycholate                               | Lipid                       | Primary Bile Acid Metabolism                |
| hexanoylcarnitine (C6)                               | Lipid                       | Fatty Acid Metabolism (Acyl Carnitine)      |
| Indoleacetate                                        | Amino Acid                  | Tryptophan Metabolism                       |
| mannitol/sorbitol                                    | Carbohydrate                | Fructose, Mannose and Galactose Metabolism  |
| Nicotinamide                                         | Cofactors and Vitamins      | Nicotinate and Nicotinamide Metabolism      |
| N-methylproline                                      | Amino Acid                  | Urea cycle; Arginine and Proline Metabolism |
| octanoylcarnitine (C8)                               | Lipid                       | Fatty Acid Metabolism (Acyl Carnitine)      |
| oleoyl-linoleoyl-glycerol (18:1/18:2) [1]            | Lipid                       | Diacylglycerol                              |
| phenol sulfate                                       | Amino Acid                  | Tyrosine Metabolism                         |
| Pipecolate                                           | Amino Acid                  | Lysine Metabolism                           |
| pregnen-diol disulfate*                              | Lipid                       | Steroid                                     |
| <u>Pyridoxate</u>                                    | Cofactors and Vitamins      | Vitamin B6 Metabolism                       |
| <u>trigonelline (N'-methylnicotinate)</u>            | Cofactors and Vitamins      | Nicotinate and Nicotinamide Metabolism      |

|                                                                                                                           |            |                         |
|---------------------------------------------------------------------------------------------------------------------------|------------|-------------------------|
| trimethylamine N-oxide                                                                                                    | Lipid      | Phospholipid Metabolism |
| tryptophan betaine                                                                                                        | Amino Acid | Tryptophan Metabolism   |
| X - 09789, retired for 2,6-dihydroxybenzoic acid                                                                          | Unknown    | Unknown                 |
| X - 11440, retired for pregnenetriol disulfate*                                                                           | Unknown    | Unknown                 |
| X - 11441, retired for bilirubin degradation product, C <sub>17</sub> H <sub>20</sub> N <sub>2</sub> O <sub>5</sub> (1)** | Unknown    | Unknown                 |
| X - 11442, retired for bilirubin degradation product, C <sub>17</sub> H <sub>20</sub> N <sub>2</sub> O <sub>5</sub> (2)** | Unknown    | Unknown                 |
| X - 12101                                                                                                                 | NA         | NA                      |
| X - 12462                                                                                                                 | NA         | NA                      |
| X - 14838, retired for 1-methyl-5-imidazoleacetate                                                                        | Unknown    | Unknown                 |
| X - 24422                                                                                                                 | NA         | NA                      |

\* Indicates compounds that have not been officially confirmed based on a standard, but we are confident in its identity

<sup>0</sup> Metabolites were classified based on the Human Metabolome Database superclass classification <http://www.hmdb.ca/classification>

The underlined metabolites are those included within the replicated metabolic clusters.

Abbreviations: CV, coefficient of variation; NA, not applicable.

**Table S3. Classifications of the 423 differential metabolites (FDR < 0.2) between PEAR participants with GWAA <45% and those with GWAA ≥45% (screening phase)**

| Metabolite Classification/ Pathway                | Metabolites with higher abundance in PEAR participants with GWAA ≥45% (n=209), N (%) | Metabolites with higher abundance in PEAR participants with GWAA <45% (n=214), N (%) |
|---------------------------------------------------|--------------------------------------------------------------------------------------|--------------------------------------------------------------------------------------|
| <b>Unknown</b>                                    | 50 (23.9%)                                                                           | 40 (18.7%)                                                                           |
| <b>Unclassified known</b>                         | 22 (10.5%)                                                                           | 18 (8.4%)                                                                            |
| <b>Carbohydrate</b>                               | 2 (1%)                                                                               | 3 (1.4%)                                                                             |
| <b>Cofactors and Vitamins</b>                     | 2 (1%)                                                                               | 9 (4.2%)                                                                             |
| <b>Nucleotide</b>                                 | 5 (2.3%)                                                                             | 9 (4.2%)                                                                             |
| <b>Peptide</b>                                    | 4 (1.9%)                                                                             | 4 (1.9%)                                                                             |
| <b>Energy</b>                                     | 2 (1%)                                                                               | 0 (0%)                                                                               |
| <b>Amino Acid</b>                                 | 41 (19.6%)                                                                           | 40 (18.7%)                                                                           |
| -Alanine and Aspartate Metabolism                 | 1 (2.4%)                                                                             | 3 (7.5%)                                                                             |
| -Creatine Metabolism                              | 3 (7.3%)                                                                             | 0 (0%)                                                                               |
| -Glutamate Metabolism                             | 2 (4.9%)                                                                             | 3 (7.5%)                                                                             |
| -Glutathione Metabolism                           | 0 (0%)                                                                               | 4 (10.0%)                                                                            |
| -Glycine, Serine and Threonine Metabolism         | 4 (9.8%)                                                                             | 2 (5.0%)                                                                             |
| -Guanidino and Acetamido Metabolism               | 1 (2.4%)                                                                             | 0 (0%)                                                                               |
| -Histidine Metabolism                             | 2 (4.9%)                                                                             | 2 (5.0%)                                                                             |
| -Leucine, Isoleucine and Valine Metabolism        | 6 (14.6%)                                                                            | 4 (10.0%)                                                                            |
| -Lysine Metabolism                                | 2 (4.9%)                                                                             | 4 (10.0%)                                                                            |
| -Methionine, Cysteine, SAM and Taurine Metabolism | 2 (4.9%)                                                                             | 5 (12.5%)                                                                            |
| -Phenylalanine Metabolism                         | 1 (2.4%)                                                                             | 0 (0%)                                                                               |
| -Polyamine Metabolism                             | 0 (0%)                                                                               | 2 (5.0%)                                                                             |
| -Tryptophan Metabolism                            | 4 (9.8%)                                                                             | 5 (12.5%)                                                                            |
| -Tyrosine Metabolism                              | 6 (14.6%)                                                                            | 1 (2.5%)                                                                             |
| -Urea cycle; Arginine and Proline Metabolism      | 7 (17.1%)                                                                            | 5 (12.5%)                                                                            |
| <b>Lipid</b>                                      | 81 (38.8%)                                                                           | 91 (42.5%)                                                                           |
| -Carnitine Metabolism                             | 0 (0%)                                                                               | 1 (1.1%)                                                                             |
| -Ceramide                                         | 2 (2.5%)                                                                             | 5 (5.5%)                                                                             |
| -Diacylglycerol                                   | 2 (2.5%)                                                                             | 11 (12.1%)                                                                           |
| -Endocannabinoid                                  | 2 (2.5%)                                                                             | 0 (0%)                                                                               |
| -Fatty Acid Metabolism (Acyl Choline)             | 0 (0%)                                                                               | 1 (1.1%)                                                                             |
| -Fatty Acid Metabolism (also BCAA Metabolism)     | 0 (0%)                                                                               | 2 (2.2%)                                                                             |
| -Fatty Acid Metabolism (Acyl Glutamine)           |                                                                                      |                                                                                      |
| -Fatty Acid Metabolism (Acyl Carnitine)           | 1 (1.2%)                                                                             | 0 (0%)                                                                               |
| -Fatty Acid Synthesis                             | 2 (2.5%)                                                                             | 13 (14.3%)                                                                           |
| -Fatty Acid                                       | 0 (0%)                                                                               | 1 (1.1%)                                                                             |
| -Ketone Bodies                                    | 6 (7.4%)                                                                             | 5 (5.5%)                                                                             |
| -Long Chain Fatty Acid                            | 1 (1.2%)                                                                             | 0 (0%)                                                                               |
| -Medium Chain Fatty Acid                          | 5 (6.3%)                                                                             | 4 (4.4%)                                                                             |
| -Lysophospholipid                                 | 0 (0%)                                                                               | 1 (1.1%)                                                                             |
| -Lysoplasmalogen                                  | 6 (7.4%)                                                                             | 13 (14.3%)                                                                           |
| -Monoacylglycerol                                 | 4 (4.9%)                                                                             | 0 (0%)                                                                               |
| -Phosphatidylcholine (PC)                         | 4 (4.9%)                                                                             | 1 (1.1%)                                                                             |
| -Phosphatidylethanolamine (PE)                    | 2 (2.5%)                                                                             | 8 (8.8%)                                                                             |
| -Phosphatidylinositol (PI)                        | 0 (0%)                                                                               | 4 (4.4%)                                                                             |

---

|                                         |            |            |
|-----------------------------------------|------------|------------|
| -Phospholipid Metabolism                | 0 (0%)     | 3 (3.3%)   |
| -Plasmalogen                            | 2 (2.5%)   | 0 (0%)     |
| -Polyunsaturated Fatty Acid (n3 and n6) | 10 (12.3%) | 0 (0%)     |
| -Bile Acid Metabolism                   | 6 (7.4%)   | 0 (0%)     |
| -Sphingolipid Metabolism                | 11 (13.6%) | 2 (2.2%)   |
| -Steroid                                | 10 (12.3%) | 12 (13.1%) |
| -Sterol                                 | 4 (4.9%)   | 4 (4.4%)   |
|                                         | 1 (1.2%)   | 0 (0%)     |

---

Abbreviations: FDR, false discovery rate; PEAR, Pharmacogenomic Evaluation of Antihypertensive Responses.



**Table S4.** The 24 metabolic clusters created using the 353 PEAR metabolites identified from screening phase

| <b>Diacylglycerol &amp; Monoacylglycerol (n=19)</b>    |                  |                      |            |                               |
|--------------------------------------------------------|------------------|----------------------|------------|-------------------------------|
| <b>Metabolite</b>                                      | <b>Pathway</b>   | <b>Estimate ± SE</b> | <b>FDR</b> | <b>Availability in PEAR-2</b> |
| palmitoleoyl-linoleoyl-glycerol (16:1/18:2) [1]*       | Diacylglycerol   | -0.54 ± 0.10         | 2.63E-06   | Absent                        |
| linoleoyl-linoleoyl-glycerol (18:2/18:2) [1]*          | Diacylglycerol   | -0.33 ± 0.10         | 1.58E-03   | Absent                        |
| linoleoyl-linolenoyl-glycerol (18:2/18:3) [2]*         | Diacylglycerol   | -0.32 ± 0.10         | 4.49E-03   | Absent                        |
| oleoyl-oleoyl-glycerol (18:1/18:1) [1]*                | Diacylglycerol   | -0.32 ± 0.10         | 4.50E-03   | Absent                        |
| oleoyl-linoleoyl-glycerol (18:1/18:2) [1]              | Diacylglycerol   | -0.28 ± 0.08         | 5.36E-03   | Absent                        |
| oleoyl-oleoyl-glycerol (18:1/18:1) [2]*                | Diacylglycerol   | -0.33 ± 0.11         | 1.02E-02   | Absent                        |
| palmitoyl-oleoyl-glycerol (16:0/18:1) [2]*             | Diacylglycerol   | -0.31 ± 0.10         | 1.52E-02   | Absent                        |
| oleoyl-linoleoyl-glycerol (18:1/18:2) [2]              | Diacylglycerol   | -0.26 ± 0.09         | 2.00E-02   | Absent                        |
| palmitoyl-linoleoyl-glycerol (16:0/18:2) [1]*          | Diacylglycerol   | -0.21 ± 0.10         | 8.23E-02   | Absent                        |
| palmitoyl-oleoyl-glycerol (16:0/18:1) [1]*             | Diacylglycerol   | -0.23 ± 0.12         | 1.23E-01   | Absent                        |
| palmitoyl-linoleoyl-glycerol (16:0/18:2) [2]*          | Diacylglycerol   | -0.18 ± 0.10         | 1.42E-01   | Absent                        |
| linoleoyl-arachidonoyl-glycerol (18:2/20:4) [2]*       | Diacylglycerol   | 0.15 ± 0.08          | 1.67E-01   | Absent                        |
| linoleoyl-arachidonoyl-glycerol (18:2/20:4) [1]*       | Diacylglycerol   | 0.14 ± 0.10          | 1.99E-01   | Absent                        |
| 1-arachidonylglycerol (20:4)                           | Monoacylglycerol | 0.30 ± 0.06          | 6.04E-05   | Present                       |
| 2-linoleoylglycerol (18:2)                             | Monoacylglycerol | 0.23 ± 0.10          | 7.30E-02   | Present                       |
| 1-palmitoleoylglycerol (16:1)*                         | Monoacylglycerol | -0.21 ± 0.10         | 1.20E-01   | Present                       |
| 1-linoleoylglycerol (18:2)                             | Monoacylglycerol | 0.11 ± 0.06          | 1.44E-01   | Present                       |
| 1-dihomo-linolenylglycerol (20:3)                      | Monoacylglycerol | 0.13 ± 0.07          | 1.84E-01   | Present                       |
| X - 24035                                              | unknown          | -0.24 ± 0.10         | 6.64E-02   | Absent                        |
| <b>Plasmalogen &amp; Lysoplasmalogen (n=17)</b>        |                  |                      |            |                               |
| <b>Metabolite</b>                                      | <b>Pathway</b>   | <b>Estimate ± SE</b> | <b>FDR</b> | <b>Availability in PEAR-2</b> |
| 1-(1-enyl-palmitoyl)-2-arachidonoyl-GPE (P-16:0/20:4)* | Plasmalogen      | 0.37 ± 0.04          | 5.91E-14   | Present                       |

|                                                                          |                          |                      |            |                               |
|--------------------------------------------------------------------------|--------------------------|----------------------|------------|-------------------------------|
| 1-(1-enyl-palmitoyl)-2-arachidonoyl-GPE (P-16:0/20:4)*                   | Plasmalogen              | 0.32 ± 0.04          | 4.21E-11   | Present                       |
| 1-(1-enyl-palmitoyl)-2-arachidonoyl-GPC (P-16:0/20:4)*                   | Plasmalogen              | 0.23 ± 0.04          | 1.09E-08   | Present                       |
| 1-(1-enyl-palmitoyl)-2-palmitoyl-GPC (P-16:0/16:0)*                      | Plasmalogen              | 0.14 ± 0.03          | 7.67E-05   | Present                       |
| 1-(1-enyl-palmitoyl)-2-oleoyl-GPC (P-16:0/18:1)*                         | Plasmalogen              | 0.13 ± 0.03          | 1.21E-03   | Present                       |
| 1-(1-enyl-stearoyl)-2-oleoyl-GPE (P-18:0/18:1)                           | Plasmalogen              | 0.17 ± 0.05          | 1.87E-03   | Present                       |
| 1-(1-enyl-palmitoyl)-2-linoleoyl-GPC (P-16:0/18:2)*                      | Plasmalogen              | 0.12 ± 0.03          | 2.84E-03   | Present                       |
| 1-(1-enyl-palmitoyl)-2-oleoyl-GPE (P-16:0/18:1)*                         | Plasmalogen              | 0.13 ± 0.04          | 5.42E-03   | Present                       |
| 1-(1-enyl-palmitoyl)-2-linoleoyl-GPE (P-16:0/18:2)*                      | Plasmalogen              | 0.15 ± 0.05          | 8.60E-03   | Present                       |
| 1-(1-enyl-stearoyl)-2-linoleoyl-GPE (P-18:0/18:2)*                       | Plasmalogen              | 0.09 ± 0.05          | 1.35E-01   | Present                       |
| 1-(1-enyl-stearoyl)-GPE (P-18:0)*                                        | Lysoplasmalogen          | 0.19 ± 0.05          | 3.37E-03   | Present                       |
| 1-(1-enyl-oleoyl)-GPE (P-18:1)*                                          | Lysoplasmalogen          | 0.19 ± 0.06          | 9.32E-03   | Present                       |
| 1-(1-enyl-palmitoyl)-GPE (P-16:0)*                                       | Lysoplasmalogen          | 0.16 ± 0.05          | 1.32E-02   | Present                       |
| 1-(1-enyl-palmitoyl)-GPC (P-16:0)*                                       | Lysoplasmalogen          | 0.09 ± 0.04          | 1.19E-01   | Present                       |
| X - 23587                                                                | unknown                  | 0.58 ± 0.10          | 9.68E-07   | Present                       |
| X - 24129                                                                | unknown                  | 0.25 ± 0.06          | 7.56E-04   | Absent                        |
| X - 23666                                                                | unknown                  | 0.16 ± 0.05          | 6.16E-03   | Absent                        |
| <b>PC, PE, PI, Lysophospholipid &amp; Phospholipid Metabolism (n=48)</b> |                          |                      |            |                               |
| <b>Metabolite</b>                                                        | <b>Pathway</b>           | <b>Estimate ± SE</b> | <b>FDR</b> | <b>Availability in PEAR-2</b> |
| 1-palmitoyl-2-palmitoleoyl-GPC (16:0/16:1)*                              | Phosphatidylcholine (PC) | -0.36 ± 0.06         | 9.68E-07   | Present                       |
| 1-palmitoleoyl-2-linolenoyl-GPC (16:1/18:3)*                             | Phosphatidylcholine (PC) | -0.29 ± 0.06         | 3.60E-05   | Absent                        |
| 1-stearoyl-2-arachidonoyl-GPC (18:0/20:4)                                | Phosphatidylcholine (PC) | 0.10 ± 0.02          | 2.20E-04   | Present                       |
| 1-palmitoyl-2-linoleoyl-GPC (16:0/18:2)                                  | Phosphatidylcholine (PC) | -0.07 ± 0.02         | 4.27E-04   | Present                       |
| 1,2-dilinoleoyl-GPC (18:2/18:2)                                          | Phosphatidylcholine (PC) | -0.14 ± 0.04         | 2.77E-03   | Present                       |
| 1-palmitoyl-2-oleoyl-GPC (16:0/18:1)                                     | Phosphatidylcholine (PC) | -0.09 ± 0.03         | 1.04E-02   | Present                       |

|                                              |                               |              |          |         |
|----------------------------------------------|-------------------------------|--------------|----------|---------|
| 1-stearoyl-2-linoleoyl-GPC (18:0/18:2)*      | Phosphatidylcholine (PC)      | -0.05 ± 0.02 | 2.32E-02 | Present |
| 1-palmitoyl-2-arachidonoyl-GPC (16:0/20:4n6) | Phosphatidylcholine (PC)      | 0.06 ± 0.02  | 3.01E-02 | Absent  |
| 1-linoleoyl-2-linolenoyl-GPC (18:2/18:3)*    | Phosphatidylcholine (PC)      | -0.18 ± 0.07 | 3.51E-02 | Present |
| 1-stearoyl-2-oleoyl-GPC (18:0/18:1)          | Phosphatidylcholine (PC)      | -0.07 ± 0.04 | 1.38E-01 | Present |
| 1-stearoyl-2-linoleoyl-GPE (18:0/18:2)*      | Phosphatidylethanolamine (PE) | -0.28 ± 0.06 | 2.11E-04 | Present |
| 1-palmitoyl-2-linoleoyl-GPE (16:0/18:2)      | Phosphatidylethanolamine (PE) | -0.29 ± 0.07 | 2.94E-04 | Present |
| 1-oleoyl-2-linoleoyl-GPE (18:1/18:2)*        | Phosphatidylethanolamine (PE) | -0.22 ± 0.07 | 5.83E-03 | Absent  |
| 1-palmitoyl-2-oleoyl-GPE (16:0/18:1)         | Phosphatidylethanolamine (PE) | -0.13 ± 0.07 | 1.69E-01 | Present |
| 1-palmitoyl-2-oleoyl-GPI (16:0/18:1)*        | Phosphatidylinositol (PI)     | -0.24 ± 0.07 | 5.36E-03 | Present |
| 1-palmitoyl-2-arachidonoyl-GPI (16:0/20:4)*  | Phosphatidylinositol (PI)     | -0.17 ± 0.06 | 3.00E-02 | Present |
| 1-palmitoyl-2-linoleoyl-GPI (16:0/18:2)      | Phosphatidylinositol (PI)     | -0.12 ± 0.05 | 7.11E-02 | Present |
| 1-palmitoleoyl-GPC (16:1)*                   | Lysophospholipid              | -0.29 ± 0.05 | 3.00E-08 | Present |
| 1-linoleoyl-GPE (18:2)*                      | Lysophospholipid              | -0.29 ± 0.05 | 4.85E-08 | Present |
| 2-palmitoleoyl-GPC (16:1)*                   | Lysophospholipid              | -0.35 ± 0.08 | 1.81E-04 | Present |
| 1-linolenoyl-GPC (18:3)*                     | Lysophospholipid              | -0.25 ± 0.06 | 4.63E-04 | Present |
| 1-palmitoyl-GPE (16:0)                       | Lysophospholipid              | -0.18 ± 0.05 | 8.85E-04 | Present |
| 1-stearoyl-GPE (18:0)                        | Lysophospholipid              | -0.16 ± 0.04 | 2.77E-03 | Present |
| 1-arachidonoyl-GPI (20:4)*                   | Lysophospholipid              | 0.15 ± 0.05  | 5.36E-03 | Present |
| 1-arachidonoyl-GPC (20:4n6)*                 | Lysophospholipid              | 0.12 ± 0.04  | 8.01E-03 | Present |
| 1-palmitoyl-GPC (16:0)                       | Lysophospholipid              | -0.09 ± 0.03 | 8.07E-03 | Present |
| 1-linoleoyl-GPI (18:2)*                      | Lysophospholipid              | 0.16 ± 0.05  | 9.82E-03 | Present |
| 2-palmitoyl-GPC (16:0)*                      | Lysophospholipid              | -0.17 ± 0.06 | 1.49E-02 | Present |
| 1-oleoyl-GPE (18:1)                          | Lysophospholipid              | -0.14 ± 0.05 | 2.45E-02 | Present |
| 1-linoleoyl-GPC (18:2)                       | Lysophospholipid              | -0.08 ± 0.03 | 3.96E-02 | Present |
| 1-lignoceroyl-GPC (24:0)                     | Lysophospholipid              | -0.12 ± 0.05 | 4.93E-02 | Present |
| 1-oleoyl-GPC (18:1)                          | Lysophospholipid              | -0.07 ± 0.03 | 4.98E-02 | Present |
| 2-stearoyl-GPE (18:0)*                       | Lysophospholipid              | -0.14 ± 0.06 | 6.53E-02 | Present |
| 1-stearoyl-GPI (18:0)                        | Lysophospholipid              | 0.12 ± 0.06  | 8.28E-02 | Present |
| 1-linoleoyl-GPG (18:2)*                      | Lysophospholipid              | 0.10 ± 0.05  | 1.40E-01 | Present |
| 1-oleoyl-GPI (18:1)*                         | Lysophospholipid              | 0.13 ± 0.07  | 1.44E-01 | Present |

|                                                                 |                         |                      |            |                               |
|-----------------------------------------------------------------|-------------------------|----------------------|------------|-------------------------------|
| choline phosphate                                               | Phospholipid Metabolism | 0.07 ± 0.04          | 1.23E-01   | Present                       |
| Glycerophosphoethanolamine                                      | Phospholipid Metabolism | 0.07 ± 0.04          | 1.94E-01   | Present                       |
| X - 12729                                                       | unknown                 | 0.87 ± 0.08          | 5.91E-14   | Present                       |
| X - 12063, retired for metabolonic lactone sulfate              | unknown                 | -0.58 ± 0.09         | 5.51E-08   | Present                       |
| X - 13728                                                       | unknown                 | -0.64 ± 0.13         | 8.63E-06   | Present                       |
| X - 19141                                                       | unknown                 | -0.27 ± 0.07         | 2.41E-03   | Present                       |
| X - 16071, retired for 3-formylindole                           | unknown                 | -0.14 ± 0.05         | 1.91E-02   | Present                       |
| X - 24435                                                       | unknown                 | 0.13 ± 0.05          | 2.29E-02   | Absent                        |
| X - 14314, retired for pyroglutamylleucine*                     | unknown                 | 0.22 ± 0.08          | 3.27E-02   | Present                       |
| X - 24542, retired for vanillic acid glycine                    | unknown                 | -0.48 ± 0.20         | 5.10E-02   | Present                       |
| X - 21383                                                       | unknown                 | -0.17 ± 0.08         | 1.03E-01   | Present                       |
| X - 09789, retired for 2,6-dihydroxybenzoic acid                | unknown                 | -0.16 ± 0.09         | 1.69E-01   | Present                       |
| <b>Sphingolipid Metabolism &amp; Ceramides (n=33)</b>           |                         |                      |            |                               |
| <b>Metabolite</b>                                               | <b>Pathway</b>          | <b>Estimate ± SE</b> | <b>FDR</b> | <b>Availability in PEAR-2</b> |
| sphingomyelin (d18:1/14:0, d16:1/16:0)*                         | Sphingolipid Metabolism | -0.18 ± 0.03         | 7.31E-09   | Present                       |
| myristoyl dihydrosphingomyelin (d18:0/14:0)*                    | Sphingolipid Metabolism | -0.24 ± 0.04         | 3.99E-07   | Absent                        |
| sphingomyelin (d18:2/14:0, d18:1/14:1)*                         | Sphingolipid Metabolism | -0.26 ± 0.05         | 1.46E-06   | Present                       |
| sphingomyelin (d18:1/25:0, d19:0/24:1, d20:1/23:0, d19:1/24:0)* | Sphingolipid Metabolism | -0.25 ± 0.05         | 3.47E-05   | Absent                        |
| sphingomyelin (d17:2/16:0, d18:2/15:0)*                         | Sphingolipid Metabolism | -0.22 ± 0.05         | 1.08E-04   | Absent                        |
| sphingomyelin (d17:1/16:0, d18:1/15:0, d16:1/17:0)*             | Sphingolipid Metabolism | -0.14 ± 0.03         | 1.83E-04   | Absent                        |
| sphingomyelin (d18:2/24:1, d18:1/24:2)*                         | Sphingolipid Metabolism | 0.10 ± 0.03          | 1.33E-03   | Present                       |
| sphingomyelin (d18:1/18:1, d18:2/18:0)                          | Sphingolipid Metabolism | 0.10 ± 0.03          | 2.39E-03   | Present                       |
| sphingomyelin (d18:1/21:0, d17:1/22:0, d16:1/23:0)*             | Sphingolipid Metabolism | -0.13 ± 0.04         | 1.28E-02   | Present                       |
| N-nervonoyl-hexadecasphingosine (d16:1/24:1)*                   | Sphingolipid Metabolism | -0.35 ± 0.12         | 1.84E-02   | Absent                        |

|                                                                |                         |              |          |         |
|----------------------------------------------------------------|-------------------------|--------------|----------|---------|
| sphingomyelin (d18:2/16:0, d18:1/16:1)*                        | Sphingolipid Metabolism | 0.06 ± 0.02  | 3.25E-02 | Present |
| sphingomyelin (d18:2/18:1)*                                    | Sphingolipid Metabolism | 0.12 ± 0.04  | 3.47E-02 | Absent  |
| sphingomyelin (d18:1/20:0, d16:1/22:0)*                        | Sphingolipid Metabolism | -0.07 ± 0.03 | 3.55E-02 | Present |
| stearoyl sphingomyelin (d18:1/18:0)                            | Sphingolipid Metabolism | 0.07 ± 0.03  | 4.01E-02 | Present |
| sphingomyelin (d18:0/20:0, d16:0/22:0)*                        | Sphingolipid Metabolism | -0.15 ± 0.06 | 4.51E-02 | Absent  |
| sphingomyelin (d18:1/19:0, d19:1/18:0)*                        | Sphingolipid Metabolism | -0.11 ± 0.05 | 5.23E-02 | Absent  |
| N-palmitoyl-sphingadienine (d18:2/16:0)*                       | Sphingolipid Metabolism | -0.09 ± 0.04 | 5.32E-02 | Absent  |
| sphingomyelin (d18:1/24:1, d18:2/24:0)*                        | Sphingolipid Metabolism | 0.07 ± 0.03  | 8.24E-02 | Present |
| sphingomyelin (d18:2/24:2)*                                    | Sphingolipid Metabolism | 0.06 ± 0.03  | 1.16E-01 | Absent  |
| palmitoyl sphingomyelin (d18:1/16:0)                           | Sphingolipid Metabolism | 0.04 ± 0.02  | 1.16E-01 | Present |
| lignoceroyl sphingomyelin (d18:1/24:0)                         | Sphingolipid Metabolism | 0.07 ± 0.04  | 1.42E-01 | Absent  |
| sphingomyelin (d18:1/20:1, d18:2/20:0)*                        | Sphingolipid Metabolism | 0.06 ± 0.03  | 1.44E-01 | Present |
| ceramide (d18:1/14:0, d16:1/16:0)*                             | Ceramides               | -0.42 ± 0.05 | 2.22E-13 | Absent  |
| glycosyl ceramide (d18:1/20:0, d16:1/22:0)*                    | Ceramides               | -0.14 ± 0.04 | 4.15E-03 | Absent  |
| ceramide (d18:2/24:1, d18:1/24:2)*                             | Ceramides               | -0.12 ± 0.05 | 5.14E-02 | Absent  |
| ceramide (d18:1/20:0, d16:1/22:0, d20:1/18:0)*                 | Ceramides               | -0.17 ± 0.07 | 5.22E-02 | Absent  |
| N-palmitoyl-sphingosine (d18:1/16:0)                           | Ceramides               | -0.09 ± 0.04 | 6.34E-02 | Present |
| glycosyl-N-(2-hydroxynervonoyl)-sphingosine (d18:1/24:1(2OH))* | Ceramides               | 0.14 ± 0.07  | 1.05E-01 | Absent  |
| glycosyl ceramide (d18:2/24:1, d18:1/24:2)*                    | Ceramides               | 0.09 ± 0.05  | 1.89E-01 | Absent  |
| X - 14939                                                      | unknown                 | 0.35 ± 0.07  | 3.88E-06 | Present |
| X - 18901                                                      | unknown                 | -0.53 ± 0.12 | 1.04E-04 | Present |
| X - 24473                                                      | unknown                 | 0.24 ± 0.12  | 1.09E-01 | Absent  |
| X - 24870                                                      | unknown                 | 0.06 ± 0.03  | 1.52E-01 | Absent  |
| <b>Steroid &amp; Sterol (n=12)</b>                             |                         |              |          |         |

| Metabolite                                              | Pathway                             | Estimate $\pm$ SE | FDR      | Availability in PEAR-2 |
|---------------------------------------------------------|-------------------------------------|-------------------|----------|------------------------|
| androsterone sulfate                                    | Steroid                             | $-0.31 \pm 0.09$  | 5.93E-03 | Present                |
| 5alpha-androstan-3alpha,17beta-diol monosulfate (1)     | Steroid                             | $-0.33 \pm 0.10$  | 8.01E-03 | Present                |
| 5alpha-pregnan-3beta,20alpha-diol disulfate             | Steroid                             | $0.34 \pm 0.13$   | 2.96E-02 | Present                |
| pregnen-diol disulfate*                                 | Steroid                             | $0.19 \pm 0.09$   | 7.33E-02 | Present                |
| epiandrosterone sulfate                                 | Steroid                             | $-0.19 \pm 0.09$  | 9.49E-02 | Present                |
| pregnenolone sulfate                                    | Steroid                             | $0.18 \pm 0.09$   | 9.80E-02 | Present                |
| pregnanediol-3-glucuronide                              | Steroid                             | $0.21 \pm 0.11$   | 1.25E-01 | Present                |
| 5alpha-androstan-3beta,17alpha-diol disulfate           | Steroid                             | $-0.24 \pm 0.14$  | 1.83E-01 | Present                |
| Campesterol                                             | Sterol                              | $0.16 \pm 0.07$   | 8.56E-02 | Absent                 |
| X - 24947                                               | unknown                             | $-0.66 \pm 0.12$  | 1.18E-06 | Absent                 |
| X - 21258                                               | unknown                             | $-0.32 \pm 0.12$  | 3.65E-02 | Present                |
| X - 21668, retired for glyco-beta-muricholate**         | unknown                             | $0.34 \pm 0.13$   | 4.13E-02 | Present                |
| <b>Gamma-glutamyl Amino Acid (n=9)</b>                  |                                     |                   |          |                        |
| Metabolite                                              | Pathway                             | Estimate $\pm$ SE | FDR      | Availability in PEAR-2 |
| gamma-glutamylalanine                                   | Peptide / Gamma-glutamyl Amino Acid | $-0.22 \pm 0.08$  | 2.96E-02 | Present                |
| gamma-glutamylglutamine                                 | Peptide / Gamma-glutamyl Amino Acid | $-0.18 \pm 0.07$  | 4.08E-02 | Present                |
| gamma-glutamylthreonine                                 | Peptide / Gamma-glutamyl Amino Acid | $0.11 \pm 0.05$   | 7.11E-02 | Absent                 |
| gamma-glutamyl-alpha-lysine                             | Peptide / Gamma-glutamyl Amino Acid | $-0.10 \pm 0.05$  | 8.24E-02 | Absent                 |
| gamma-glutamylvaline                                    | Peptide / Gamma-glutamyl Amino Acid | $0.12 \pm 0.06$   | 1.46E-01 | Present                |
| gamma-glutamylisoleucine*                               | Peptide / Gamma-glutamyl Amino Acid | $0.11 \pm 0.06$   | 1.51E-01 | Present                |
| gamma-glutamyl-epsilon-lysine                           | Peptide / Gamma-glutamyl Amino Acid | $-0.11 \pm 0.06$  | 1.58E-01 | Present                |
| HWESASXX*                                               | Peptide / Polypeptide               | $0.25 \pm 0.12$   | 8.49E-02 | Present                |
| X - 24027                                               | unknown                             | $-0.56 \pm 0.22$  | 3.88E-02 | Present                |
| <b>Leucine, Isoleucine and Valine Metabolism (n=14)</b> |                                     |                   |          |                        |
| Metabolite                                              | Pathway                             | Estimate $\pm$ SE | FDR      | Availability in PEAR-2 |

|                                                            |                                           |                                     |            |                               |
|------------------------------------------------------------|-------------------------------------------|-------------------------------------|------------|-------------------------------|
| 3-methylglutaryl carnitine (2)                             | Leucine, Isoleucine and Valine Metabolism | $-0.74 \pm 0.07$                    | 5.91E-14   | Present                       |
| Ethylmalonate                                              | Leucine, Isoleucine and Valine Metabolism | $-0.31 \pm 0.05$                    | 4.27E-07   | Present                       |
| beta-hydroxyisovalerate                                    | Leucine, Isoleucine and Valine Metabolism | $0.28 \pm 0.05$                     | 1.46E-06   | Present                       |
| alpha-hydroxyisocaproate                                   | Leucine, Isoleucine and Valine Metabolism | $0.16 \pm 0.04$                     | 4.22E-04   | Present                       |
| 3-hydroxy-2-ethylpropionate                                | Leucine, Isoleucine and Valine Metabolism | $-0.16 \pm 0.04$                    | 2.17E-03   | Present                       |
| 3-methylglutaconate                                        | Leucine, Isoleucine and Valine Metabolism | $-0.20 \pm 0.05$                    | 2.56E-03   | Present                       |
| alpha-hydroxyisovalerate                                   | Leucine, Isoleucine and Valine Metabolism | $0.22 \pm 0.07$                     | 7.16E-03   | Present                       |
| 2-hydroxy-3-methylvalerate                                 | Leucine, Isoleucine and Valine Metabolism | $0.18 \pm 0.06$                     | 1.20E-02   | Present                       |
| N-acetyl leucine                                           | Leucine, Isoleucine and Valine Metabolism | $0.16 \pm 0.06$                     | 1.74E-02   | Present                       |
| isovaleryl carnitine (C5)                                  | Leucine, Isoleucine and Valine Metabolism | $0.12 \pm 0.05$                     | 4.06E-02   | Absent                        |
| X - 13553                                                  | unknown                                   | $0.43 \pm 0.05$                     | 1.33E-12   | Present                       |
| X - 24845                                                  | unknown                                   | $0.34 \pm 0.13$                     | 3.28E-02   | Absent                        |
| X - 24293, retired for ethyl-alpha-glucopyranose           | unknown                                   | $0.41 \pm 0.20$                     | 1.04E-01   | Present                       |
| X - 24422                                                  | unknown                                   | $0.14 \pm 0.07$                     | 1.28E-01   | Present                       |
| <b>Primary &amp; Secondary Bile Acid Metabolism (n=24)</b> |                                           |                                     |            |                               |
| <b>Metabolite</b>                                          | <b>Pathway</b>                            | <b>Estimate <math>\pm</math> SE</b> | <b>FDR</b> | <b>Availability in PEAR-2</b> |
| glycochenodeoxycholate glucuronide (1)                     | Primary Bile Acid Metabolism              | $0.55 \pm 0.13$                     | 2.10E-04   | Present                       |
| glycochenodeoxycholate sulfate                             | Primary Bile Acid Metabolism              | $0.42 \pm 0.13$                     | 7.11E-03   | Present                       |
| Taurocholate                                               | Primary Bile Acid Metabolism              | $0.45 \pm 0.15$                     | 1.02E-02   | Present                       |
| glycocholate                                               | Primary Bile Acid Metabolism              | $0.26 \pm 0.13$                     | 1.10E-01   | Present                       |
| Taurochenodeoxycholate                                     | Primary Bile Acid Metabolism              | $0.25 \pm 0.13$                     | 1.24E-01   | Present                       |
| taurochenolate sulfate                                     | Secondary Bile Acid Metabolism            | $0.35 \pm 0.09$                     | 7.45E-04   | Present                       |

|                                      |                                        |      |      |                                     |            |                               |
|--------------------------------------|----------------------------------------|------|------|-------------------------------------|------------|-------------------------------|
| glycodeoxycholate sulfate            | Secondary Metabolism                   | Bile | Acid | $0.44 \pm 0.11$                     | 8.43E-04   | Present                       |
| Isoursodeoxycholate                  | Secondary Metabolism                   | Bile | Acid | $-0.56 \pm 0.15$                    | 1.40E-03   | Absent                        |
| glycocholenate sulfate*              | Secondary Metabolism                   | Bile | Acid | $0.26 \pm 0.07$                     | 1.63E-03   | Present                       |
| Ursodeoxycholate                     | Secondary Metabolism                   | Bile | Acid | $-0.50 \pm 0.16$                    | 1.02E-02   | Present                       |
| tauroolithocholate 3-sulfate         | Secondary Metabolism                   | Bile | Acid | $0.26 \pm 0.12$                     | 9.19E-02   | Present                       |
| Glycohyocholate                      | Secondary Metabolism                   | Bile | Acid | $0.24 \pm 0.13$                     | 1.44E-01   | Present                       |
| glycolithocholate sulfate*           | Secondary Metabolism                   | Bile | Acid | $0.22 \pm 0.12$                     | 1.65E-01   | Present                       |
| X - 16935                            | unknown                                |      |      | $0.54 \pm 0.09$                     | 7.50E-08   | Present                       |
| X - 18899                            | unknown                                |      |      | $0.28 \pm 0.07$                     | 2.94E-04   | Present                       |
| X - 11880                            | unknown                                |      |      | $0.21 \pm 0.06$                     | 4.93E-03   | Present                       |
| X - 21471                            | unknown                                |      |      | $0.29 \pm 0.09$                     | 4.98E-03   | Present                       |
| X - 11378                            | unknown                                |      |      | $0.20 \pm 0.07$                     | 1.54E-02   | Present                       |
| X - 24748                            | unknown                                |      |      | $0.17 \pm 0.06$                     | 2.78E-02   | Present                       |
| X - 17162                            | unknown                                |      |      | $0.47 \pm 0.19$                     | 4.06E-02   | Absent                        |
| X - 11308                            | unknown                                |      |      | $0.13 \pm 0.05$                     | 6.00E-02   | Present                       |
| X - 11372                            | unknown                                |      |      | $0.13 \pm 0.06$                     | 6.62E-02   | Present                       |
| X - 21339                            | unknown                                |      |      | $0.13 \pm 0.06$                     | 1.16E-01   | Present                       |
| X - 12851                            | unknown                                |      |      | $0.31 \pm 0.17$                     | 1.61E-01   | Present                       |
| <b>Cofactors and Vitamins (n=23)</b> |                                        |      |      |                                     |            |                               |
| <b>Metabolite</b>                    | <b>Pathway</b>                         |      |      | <b>Estimate <math>\pm</math> SE</b> | <b>FDR</b> | <b>Availability in PEAR-2</b> |
| trigonelline (N'-methylnicotinate)   | Nicotinate and Nicotinamide Metabolism |      |      | $-0.75 \pm 0.14$                    | 1.87E-06   | Present                       |
| N1-Methyl-2-pyridone-5-carboxamide   | Nicotinate and Nicotinamide Metabolism |      |      | $-0.16 \pm 0.06$                    | 2.64E-02   | Present                       |
| 1-methylnicotinamide                 | Nicotinate and Nicotinamide Metabolism |      |      | $-0.11 \pm 0.07$                    | 1.99E-01   | Present                       |
| L-urobilin                           | Hemoglobin and Porphyrin Metabolism    |      |      | $0.78 \pm 0.19$                     | 6.57E-04   | Present                       |
| gamma-CEHC                           | Tocopherol Metabolism                  |      |      | $-0.31 \pm 0.08$                    | 1.57E-03   | Present                       |
| alpha-tocopherol                     | Tocopherol Metabolism                  |      |      | $-0.11 \pm 0.04$                    | 4.33E-02   | Present                       |
| gamma-CEHC glucuronide*              | Tocopherol Metabolism                  |      |      | $-0.24 \pm 0.10$                    | 5.32E-02   | Present                       |
| gamma-tocopherol/beta-tocopherol     | Tocopherol Metabolism                  |      |      | $0.12 \pm 0.06$                     | 1.30E-01   | Present                       |



|                                                                      |                                            |                                     |            |                               |
|----------------------------------------------------------------------|--------------------------------------------|-------------------------------------|------------|-------------------------------|
| Pantothenate                                                         | Pantothenate and CoA Metabolism            | $-0.22 \pm 0.06$                    | 1.09E-03   | Present                       |
| retinol (Vitamin A)                                                  | Vitamin A Metabolism                       | $-0.14 \pm 0.04$                    | 3.54E-03   | Present                       |
| Pyridoxate                                                           | Vitamin B6 Metabolism                      | $-0.29 \pm 0.10$                    | 1.61E-02   | Present                       |
| X - 11485, retired for sulfate of piperine metabolite C18H21NO3 (1)* | Unknown                                    | $0.49 \pm 0.11$                     | 1.01E-04   | Present                       |
| X - 12511, retired for N-acetyl-2-aminooctanoate                     | Unknown                                    | $0.32 \pm 0.07$                     | 2.87E-04   | Present                       |
| X - 12544                                                            | Unknown                                    | $0.97 \pm 0.24$                     | 7.32E-04   | Present                       |
| X - 11452, retired for sulfate of piperine metabolite C16H19NO3 (2)* | Unknown                                    | $0.39 \pm 0.11$                     | 2.40E-03   | Present                       |
| X - 12231, retired for sulfate of piperine metabolite C16H19NO3 (3)* | Unknown                                    | $0.34 \pm 0.11$                     | 8.20E-03   | Present                       |
| X - 11852                                                            | Unknown                                    | $0.59 \pm 0.19$                     | 1.12E-02   | Present                       |
| X - 12013                                                            | Unknown                                    | $0.63 \pm 0.24$                     | 3.47E-02   | Present                       |
| X - 11850                                                            | Unknown                                    | $0.66 \pm 0.27$                     | 4.89E-02   | Present                       |
| X - 11843                                                            | Unknown                                    | $0.59 \pm 0.26$                     | 6.50E-02   | Present                       |
| X - 21849, retired for glycine conjugate of C10H14O2 (1)*            | Unknown                                    | $0.18 \pm 0.09$                     | 1.35E-01   | Present                       |
| X - 17685                                                            | Unknown                                    | $-0.36 \pm 0.19$                    | 1.42E-01   | Present                       |
| X - 14662, retired for glyoursodeoxycholate sulfate (1)              | Unknown                                    | $0.32 \pm 0.18$                     | 1.65E-01   | Present                       |
| <b>Pyrimidine &amp; Purine Metabolism (n=14)</b>                     |                                            |                                     |            |                               |
| <b>Metabolite</b>                                                    | <b>Pathway</b>                             | <b>Estimate <math>\pm</math> SE</b> | <b>FDR</b> | <b>Availability in PEAR-2</b> |
| N4-acetylcytidine                                                    | Pyrimidine Metabolism, Cytidine containing | $-0.35 \pm 0.06$                    | 2.04E-06   | Present                       |
| Cytidine                                                             | Pyrimidine Metabolism, Cytidine containing | $-0.20 \pm 0.06$                    | 3.65E-03   | Present                       |
| 2'-O-methyluridine                                                   | Pyrimidine Metabolism, Uracil containing   | $0.21 \pm 0.06$                     | 4.93E-03   | Absent                        |
| N-acetyl-beta-alanine                                                | Pyrimidine Metabolism, Uracil containing   | $-0.11 \pm 0.04$                    | 1.73E-02   | Present                       |
| Pseudouridine                                                        | Pyrimidine Metabolism, Uracil containing   | $-0.06 \pm 0.03$                    | 9.92E-02   | Present                       |
| Uridine                                                              | Pyrimidine Metabolism, Uracil containing   | $-0.07 \pm 0.03$                    | 1.04E-01   | Present                       |

|                                                           |                                                            |                                         |            |                                   |
|-----------------------------------------------------------|------------------------------------------------------------|-----------------------------------------|------------|-----------------------------------|
| 3-ureidopropionate                                        | Pyrimidine Metabolism,<br>Uracil containing                | $0.13 \pm 0.07$                         | 1.28E-01   | Present                           |
| 5-methyluridine (ribothymidine)                           | Pyrimidine Metabolism,<br>Uracil containing                | $-0.06 \pm 0.03$                        | 1.91E-01   | Present                           |
| 3-aminoisobutyrate                                        | Pyrimidine Metabolism,<br>Thymine containing               | $-0.22 \pm 0.07$                        | 6.16E-03   | Present                           |
| Inosine                                                   | Purine Metabolism,<br>(Hypo)Xanthine/Inosine<br>containing | $0.25 \pm 0.09$                         | 1.55E-02   | Present                           |
| Hypoxanthine                                              | Purine Metabolism,<br>(Hypo)Xanthine/Inosine<br>containing | $0.24 \pm 0.09$                         | 2.71E-02   | Present                           |
| N1-methylinosine                                          | Purine Metabolism,<br>(Hypo)Xanthine/Inosine<br>containing | $-0.09 \pm 0.04$                        | 8.47E-02   | Present                           |
| N1-methyladenosine                                        | Purine Metabolism, Adenine<br>containing                   | $-0.05 \pm 0.02$                        | 5.40E-02   | Present                           |
| adenosine 5'-monophosphate<br>(AMP)                       | Purine Metabolism, Adenine<br>containing                   | $0.16 \pm 0.08$                         | 1.19E-01   | Present                           |
| <b>Urea cycle; Arginine and Proline Metabolism (n=12)</b> |                                                            |                                         |            |                                   |
| <b>Metabolite</b>                                         | <b>Pathway</b>                                             | <b>Estimate <math>\pm</math><br/>SE</b> | <b>FDR</b> | <b>Availability<br/>in PEAR-2</b> |
| N-delta-acetylornithine                                   | Urea cycle; Arginine and<br>Proline Metabolism             | $-0.43 \pm 0.07$                        | 1.29E-07   | Present                           |
| N-acetylcitrulline                                        | Urea cycle; Arginine and<br>Proline Metabolism             | $0.65 \pm 0.11$                         | 4.27E-07   | Present                           |
| trans-4-hydroxyproline                                    | Urea cycle; Arginine and<br>Proline Metabolism             | $0.31 \pm 0.05$                         | 4.27E-07   | Present                           |
| Ornithine                                                 | Urea cycle; Arginine and<br>Proline Metabolism             | $-0.16 \pm 0.03$                        | 4.97E-07   | Present                           |
| Homoarginine                                              | Urea cycle; Arginine and<br>Proline Metabolism             | $0.26 \pm 0.05$                         | 9.68E-07   | Present                           |
| N-acetylarginine                                          | Urea cycle; Arginine and<br>Proline Metabolism             | $0.28 \pm 0.05$                         | 2.45E-06   | Present                           |
| Proline                                                   | Urea cycle; Arginine and<br>Proline Metabolism             | $-0.12 \pm 0.03$                        | 1.15E-04   | Present                           |
| Homocitrulline                                            | Urea cycle; Arginine and<br>Proline Metabolism             | $0.18 \pm 0.07$                         | 2.68E-02   | Present                           |
| N-acetylproline                                           | Urea cycle; Arginine and<br>Proline Metabolism             | $-0.20 \pm 0.08$                        | 2.78E-02   | Present                           |
| Arginine                                                  | Urea cycle; Arginine and<br>Proline Metabolism             | $0.07 \pm 0.03$                         | 3.00E-02   | Present                           |

| dimethylarginine (SDMA + ADMA)                        | Urea cycle; Arginine and Proline Metabolism | -0.05 ± 0.02  | 5.29E-02 | Present                |
|-------------------------------------------------------|---------------------------------------------|---------------|----------|------------------------|
| N2,N5-diacetylornithine                               | Urea cycle; Arginine and Proline Metabolism | 0.18 ± 0.09   | 1.16E-01 | Present                |
| <b>Tyrosine Metabolism (n=7)</b>                      |                                             |               |          |                        |
| Metabolite                                            | Pathway                                     | Estimate ± SE | FDR      | Availability in PEAR-2 |
| 3-methoxytyrosine                                     | Tyrosine Metabolism                         | 0.18 ± 0.04   | 1.26E-05 | Present                |
| Vanillactate                                          | Tyrosine Metabolism                         | 0.28 ± 0.07   | 1.62E-03 | Absent                 |
| 3-(4-hydroxyphenyl)lactate                            | Tyrosine Metabolism                         | 0.15 ± 0.04   | 4.44E-03 | Present                |
| gentisate                                             | Tyrosine Metabolism                         | -0.31 ± 0.11  | 1.54E-02 | Present                |
| dopamine 3-O-sulfate                                  | Tyrosine Metabolism                         | 0.19 ± 0.07   | 2.98E-02 | Absent                 |
| N-acetyltyrosine                                      | Tyrosine Metabolism                         | 0.12 ± 0.06   | 1.23E-01 | Present                |
| tyramine O-sulfate                                    | Tyrosine Metabolism                         | 0.26 ± 0.15   | 1.69E-01 | Present                |
| <b>Glutamate Metabolism (n=5)</b>                     |                                             |               |          |                        |
| Metabolite                                            | Pathway                                     | Estimate ± SE | FDR      | Availability in PEAR-2 |
| N-acetylglutamine                                     | Glutamate Metabolism                        | 0.27 ± 0.07   | 7.32E-04 | Present                |
| beta-citrylglutamate                                  | Glutamate Metabolism                        | -0.16 ± 0.04  | 1.09E-03 | Absent                 |
| Glutamine                                             | Glutamate Metabolism                        | -0.07 ± 0.02  | 8.07E-03 | Present                |
| N-acetylglutamate                                     | Glutamate Metabolism                        | 0.11 ± 0.05   | 5.95E-02 | Present                |
| pyroglutamine*                                        | Glutamate Metabolism                        | -0.13 ± 0.06  | 1.16E-01 | Present                |
| <b>Glycine, Serine and Threonine Metabolism (n=9)</b> |                                             |               |          |                        |
| Metabolite                                            | Pathway                                     | Estimate ± SE | FDR      | Availability in PEAR-2 |
| Sarcosine                                             | Glycine, Serine and Threonine Metabolism    | -0.13 ± 0.04  | 6.16E-03 | Present                |
| Dimethylglycine                                       | Glycine, Serine and Threonine Metabolism    | 0.12 ± 0.04   | 1.36E-02 | Present                |
| Threonine                                             | Glycine, Serine and Threonine Metabolism    | 0.08 ± 0.03   | 3.26E-02 | Present                |
| Glycine                                               | Glycine, Serine and Threonine Metabolism    | -0.08 ± 0.03  | 5.39E-02 | Present                |
| N-acetylglycine                                       | Glycine, Serine and Threonine Metabolism    | 0.13 ± 0.07   | 1.26E-01 | Present                |
| Betaine                                               | Glycine, Serine and Threonine Metabolism    | 0.05 ± 0.03   | 1.64E-01 | Present                |
| X - 24806                                             | unknown                                     | -0.05 ± 0.02  | 1.93E-02 | Absent                 |
| X - 24804                                             | unknown                                     | -0.05 ± 0.02  | 3.00E-02 | Absent                 |
| X - 24803                                             | unknown                                     | -0.02 ± 0.01  | 5.75E-02 | Absent                 |
| <b>Glutathione Metabolism (n=5)</b>                   |                                             |               |          |                        |

| Metabolite                                                    | Pathway                                          | Estimate $\pm$ SE | FDR      | Availability in PEAR-2 |
|---------------------------------------------------------------|--------------------------------------------------|-------------------|----------|------------------------|
| cysteine-glutathione disulfide                                | Glutathione Metabolism                           | $-0.40 \pm 0.09$  | 1.11E-04 | Absent                 |
| 5-oxoproline                                                  | Glutathione Metabolism                           | $-0.12 \pm 0.03$  | 2.33E-04 | Present                |
| N-acetylphenylalanine                                         | Phenylalanine Metabolism                         | $0.19 \pm 0.06$   | 8.34E-03 | Present                |
| Cysteinylglycine                                              | Glutathione Metabolism                           | $-0.14 \pm 0.07$  | 1.09E-01 | Present                |
| cys-gly, oxidized                                             | Glutathione Metabolism                           | $-0.16 \pm 0.09$  | 1.64E-01 | Present                |
| <b>Methionine, Cysteine, SAM and Taurine Metabolism (n=7)</b> |                                                  |                   |          |                        |
| Metabolite                                                    | Pathway                                          | Estimate $\pm$ SE | FDR      | Availability in PEAR-2 |
| hypotaurine                                                   | Methionine, Cysteine, SAM and Taurine Metabolism | $-0.29 \pm 0.07$  | 7.03E-04 | Present                |
| Methionine                                                    | Methionine, Cysteine, SAM and Taurine Metabolism | $0.07 \pm 0.02$   | 9.62E-03 | Present                |
| N-acetylmethionine                                            | Methionine, Cysteine, SAM and Taurine Metabolism | $0.11 \pm 0.04$   | 5.40E-02 | Present                |
| methionine sulfone                                            | Methionine, Cysteine, SAM and Taurine Metabolism | $-0.11 \pm 0.05$  | 6.90E-02 | Present                |
| S-methylcysteine                                              | Methionine, Cysteine, SAM and Taurine Metabolism | $-0.10 \pm 0.05$  | 1.18E-01 | Present                |
| S-methylcysteine sulfoxide                                    | Methionine, Cysteine, SAM and Taurine Metabolism | $-0.13 \pm 0.07$  | 1.37E-01 | Absent                 |
| Cysteine                                                      | Methionine, Cysteine, SAM and Taurine Metabolism | $-0.06 \pm 0.04$  | 1.99E-01 | Present                |
| <b>Lysine Metabolism (n=8)</b>                                |                                                  |                   |          |                        |
| Metabolite                                                    | Pathway                                          | Estimate $\pm$ SE | FDR      | Availability in PEAR-2 |
| N-trimethyl 5-aminovalerate                                   | Lysine Metabolism                                | $-0.23 \pm 0.04$  | 2.75E-06 | Absent                 |
| N6-acetyllysine                                               | Lysine Metabolism                                | $-0.16 \pm 0.04$  | 7.86E-05 | Present                |
| 5-hydroxylysine                                               | Lysine Metabolism                                | $-0.19 \pm 0.04$  | 1.00E-04 | Present                |
| Lysine                                                        | Lysine Metabolism                                | $-0.08 \pm 0.02$  | 3.18E-04 | Present                |
| 6-oxopiperidine-2-carboxylate                                 | Lysine Metabolism                                | $0.15 \pm 0.06$   | 2.82E-02 | Absent                 |
| N-acetyl-cadaverine                                           | Lysine Metabolism                                | $0.36 \pm 0.18$   | 1.15E-01 | Present                |
| X - 13835, retired for 1-methyl-5-imidazolelactate            | unknown                                          | $0.27 \pm 0.10$   | 2.69E-02 | Present                |
| X - 23652                                                     | unknown                                          | $0.19 \pm 0.08$   | 5.87E-02 | Present                |
| <b>Alanine and Aspartate Metabolism (n=4)</b>                 |                                                  |                   |          |                        |
| Metabolite                                                    | Pathway                                          | Estimate $\pm$ SE | FDR      | Availability in PEAR-2 |
| alanine                                                       | Alanine and Aspartate Metabolism                 | $-0.14 \pm 0.03$  | 3.98E-05 | Present                |

| Asparagine                                           | Alanine and Aspartate Metabolism                     | $-0.05 \pm 0.02$  | 7.15E-02 | Present                |
|------------------------------------------------------|------------------------------------------------------|-------------------|----------|------------------------|
| N-acetylaspartate (NAA)                              | Alanine and Aspartate Metabolism                     | $0.05 \pm 0.03$   | 1.69E-01 | Present                |
| Aspartate                                            | Alanine and Aspartate Metabolism                     | $-0.07 \pm 0.04$  | 1.99E-01 | Present                |
| <b>Histidine Metabolism (n=4)</b>                    |                                                      |                   |          |                        |
| Metabolite                                           | Pathway                                              | Estimate $\pm$ SE | FDR      | Availability in PEAR-2 |
| N-acetyl-1-methylhistidine*                          | Histidine Metabolism                                 | $0.44 \pm 0.08$   | 1.74E-06 | Present                |
| 1-methylimidazoleacetate                             | Histidine Metabolism                                 | $-0.12 \pm 0.03$  | 3.51E-03 | Present                |
| hydantoin-5-propionic acid                           | Histidine Metabolism                                 | $-0.21 \pm 0.08$  | 2.37E-02 | Present                |
| 1-methylhistidine                                    | Histidine Metabolism                                 | $0.13 \pm 0.05$   | 2.68E-02 | Present                |
| <b>Carbohydrate (n=5)</b>                            |                                                      |                   |          |                        |
| Metabolite                                           | Pathway                                              | Estimate $\pm$ SE | FDR      | Availability in PEAR-2 |
| Mannose                                              | Fructose, Mannose and Galactose Metabolism           | $0.09 \pm 0.03$   | 1.11E-02 | Present                |
| erythronate*                                         | Aminosugar Metabolism                                | $-0.08 \pm 0.03$  | 1.19E-02 | Present                |
| N-acetylglucosamine/N-acetylgalactosamine            | Aminosugar Metabolism                                | $0.08 \pm 0.03$   | 1.20E-02 | Present                |
| 1,5-anhydroglucitol (1,5-AG)                         | Glycolysis, Gluconeogenesis, and Pyruvate Metabolism | $-0.11 \pm 0.04$  | 3.28E-02 | Present                |
| arabonate/xylonate                                   | Pentose Metabolism                                   | $-0.12 \pm 0.05$  | 4.06E-02 | Present                |
| <b>Creatine Metabolism (n=3)</b>                     |                                                      |                   |          |                        |
| Metabolite                                           | Pathway                                              | Estimate $\pm$ SE | FDR      | Availability in PEAR-2 |
| Creatinine                                           | Creatine Metabolism                                  | $0.08 \pm 0.02$   | 5.56E-04 | Present                |
| Creatine                                             | Creatine Metabolism                                  | $0.13 \pm 0.05$   | 2.34E-02 | Present                |
| guanidinoacetate                                     | Creatine Metabolism                                  | $0.07 \pm 0.04$   | 1.35E-01 | Present                |
| <b>Fatty Acid (n=41)</b>                             |                                                      |                   |          |                        |
| Metabolite                                           | Pathway                                              | Estimate $\pm$ SE | FDR      | Availability in PEAR-2 |
| glutarate (pentanedioate)                            | Fatty Acid, Dicarboxylate                            | $0.42 \pm 0.08$   | 9.70E-06 | Present                |
| Tetradecanedioate                                    | Fatty Acid, Dicarboxylate                            | $-0.25 \pm 0.06$  | 5.27E-04 | Present                |
| 3-carboxy-4-methyl-5-propyl-2-furanpropanoate (CMPF) | Fatty Acid, Dicarboxylate                            | $0.56 \pm 0.15$   | 1.49E-03 | Present                |
| Dodecanedioate                                       | Fatty Acid, Dicarboxylate                            | $-0.17 \pm 0.05$  | 2.92E-03 | Present                |
| Maleate                                              | Fatty Acid, Dicarboxylate                            | $-0.16 \pm 0.09$  | 1.45E-01 | Present                |
| linoleoyl ethanolamide                               | Endocannabinoid                                      | $0.25 \pm 0.06$   | 5.19E-04 | Present                |
| oleoyl ethanolamide                                  | Endocannabinoid                                      | $0.11 \pm 0.05$   | 9.73E-02 | Present                |

|                                                    |                                        |                  |          |         |
|----------------------------------------------------|----------------------------------------|------------------|----------|---------|
| stearate (18:0)                                    | Long Chain Fatty Acid                  | $0.14 \pm 0.04$  | 1.05E-03 | Present |
| myristoleate (14:1n5)                              | Long Chain Fatty Acid                  | $-0.24 \pm 0.07$ | 3.37E-03 | Present |
| pentadecanoate (15:0)                              | Long Chain Fatty Acid                  | $-0.08 \pm 0.03$ | 3.25E-02 | Present |
| arachidate (20:0)                                  | Long Chain Fatty Acid                  | $0.07 \pm 0.03$  | 7.51E-02 | Present |
| eicosenoate (20:1)                                 | Long Chain Fatty Acid                  | $0.13 \pm 0.07$  | 1.15E-01 | Present |
| myristate (14:0)                                   | Long Chain Fatty Acid                  | $-0.11 \pm 0.05$ | 1.16E-01 | Present |
| margarate (17:0)                                   | Long Chain Fatty Acid                  | $0.09 \pm 0.05$  | 1.45E-01 | Present |
| erucate (22:1n9)                                   | Long Chain Fatty Acid                  | $0.11 \pm 0.06$  | 1.60E-01 | Present |
| palmitoleate (16:1n7)                              | Long Chain Fatty Acid                  | $-0.14 \pm 0.08$ | 1.92E-01 | Present |
| arachidonate (20:4n6)                              | Polyunsaturated Fatty Acid (n3 and n6) | $0.18 \pm 0.05$  | 1.21E-03 | Present |
| docosahexaenoate (DHA; 22:6n3)                     | Polyunsaturated Fatty Acid (n3 and n6) | $0.24 \pm 0.06$  | 1.95E-03 | Present |
| docosapentaenoate (n6 DPA; 22:5n6)                 | Polyunsaturated Fatty Acid (n3 and n6) | $0.19 \pm 0.06$  | 6.29E-03 | Present |
| docosadienoate (22:2n6)                            | Polyunsaturated Fatty Acid (n3 and n6) | $0.14 \pm 0.06$  | 4.40E-02 | Absent  |
| dihomo-linoleate (20:2n6)                          | Polyunsaturated Fatty Acid (n3 and n6) | $0.14 \pm 0.06$  | 6.98E-02 | Present |
| adrenate (22:4n6)                                  | Polyunsaturated Fatty Acid (n3 and n6) | $0.13 \pm 0.07$  | 1.26E-01 | Present |
| 15-methylpalmitate                                 | Fatty Acid, Branched                   | $-0.13 \pm 0.05$ | 2.31E-02 | Present |
| 9-hydroxystearate                                  | Fatty Acid, Monohydroxy                | $-0.22 \pm 0.09$ | 4.03E-02 | Absent  |
| 3-hydroxydecanoate                                 | Fatty Acid, Monohydroxy                | $0.14 \pm 0.06$  | 6.90E-02 | Present |
| alpha-hydroxycaproate                              | Fatty Acid, Monohydroxy                | $0.17 \pm 0.08$  | 8.15E-02 | Absent  |
| 3-hydroxylaurate                                   | Fatty Acid, Monohydroxy                | $0.13 \pm 0.06$  | 8.49E-02 | Present |
| laurate (12:0)                                     | Medium Chain Fatty Acid                | $-0.17 \pm 0.05$ | 6.22E-03 | Present |
| 2-aminoheptanoate                                  | Fatty Acid, Amino                      | $0.15 \pm 0.05$  | 1.27E-02 | Present |
| acetoacetate                                       | Ketone Bodies                          | $0.29 \pm 0.13$  | 8.53E-02 | Absent  |
| X - 02269, retired for hydroxy-CMPF*               | unknown                                | $0.49 \pm 0.14$  | 2.56E-03 | Present |
| X - 21353                                          | unknown                                | $0.22 \pm 0.06$  | 3.64E-03 | Present |
| X - 21607                                          | unknown                                | $0.23 \pm 0.07$  | 7.83E-03 | Present |
| X - 23293, retired for cis-4-decenoate             | unknown                                | $0.25 \pm 0.08$  | 8.38E-03 | Present |
| X - 13866                                          | unknown                                | $0.23 \pm 0.09$  | 3.73E-02 | Present |
| X - 11438, retired for tridecenedioate (C13:1-DC)* | unknown                                | $-0.20 \pm 0.08$ | 3.81E-02 | Present |
| X - 12849                                          | unknown                                | $0.35 \pm 0.15$  | 6.51E-02 | Present |

| X - 22764, retired for branched-chain, straight-chain, or cyclopropyl 12:1 fatty acid* | unknown                                      | $0.16 \pm 0.07$   | 8.01E-02 | Present                |
|----------------------------------------------------------------------------------------|----------------------------------------------|-------------------|----------|------------------------|
| X - 13891, retired for dodecenedioate (C12:1-DC)                                       | unknown                                      | $0.24 \pm 0.12$   | 1.06E-01 | Present                |
| X - 17327, retired for glutamine conjugate of C7H12O2*                                 | unknown                                      | $-0.24 \pm 0.12$  | 1.25E-01 | Present                |
| X - 12442, retired for tetradecadienoate (14:2)*                                       | unknown                                      | $0.10 \pm 0.06$   | 1.99E-01 | Present                |
| <b>Fatty Acid Metabolism (Acyl Carnitine) (n=21)</b>                                   |                                              |                   |          |                        |
| Metabolite                                                                             | Pathway                                      | Estimate $\pm$ SE | FDR      | Availability in PEAR-2 |
| adipoylcarnitine (C6-DC)                                                               | Fatty Acid Metabolism (Acyl Carnitine)       | $-0.45 \pm 0.07$  | 1.09E-08 | Absent                 |
| nervonoylcarnitine (C24:1)*                                                            | Fatty Acid Metabolism (Acyl Carnitine)       | $-0.20 \pm 0.05$  | 2.04E-04 | Absent                 |
| butyrylcarnitine (C4)                                                                  | Fatty Acid Metabolism (also BCAA Metabolism) | $-0.20 \pm 0.05$  | 1.66E-03 | Absent                 |
| behenoylcarnitine (C22)*                                                               | Fatty Acid Metabolism (Acyl Carnitine)       | $-0.22 \pm 0.06$  | 2.40E-03 | Absent                 |
| margaroylcarnitine*                                                                    | Fatty Acid Metabolism (Acyl Carnitine)       | $-0.17 \pm 0.05$  | 3.21E-03 | Absent                 |
| lignoceroylcarnitine (C24)*                                                            | Fatty Acid Metabolism (Acyl Carnitine)       | $-0.17 \pm 0.05$  | 4.05E-03 | Absent                 |
| dihomo-linolenoylcarnitine (20:3n3 or 6)*                                              | Fatty Acid Metabolism (Acyl Carnitine)       | $-0.17 \pm 0.05$  | 5.52E-03 | Absent                 |
| malonylcarnitine                                                                       | Fatty Acid Synthesis                         | $-0.15 \pm 0.05$  | 6.92E-03 | Present                |
| pimeloylcarnitine/3-methyladipoylcarnitine (C7-DC)                                     | Fatty Acid Metabolism (Acyl Carnitine)       | $-0.21 \pm 0.07$  | 1.67E-02 | Absent                 |
| hexanoylglutamine                                                                      | Fatty Acid Metabolism (Acyl Glutamine)       | $0.29 \pm 0.10$   | 1.93E-02 | Absent                 |
| myristoylcarnitine (C14)                                                               | Fatty Acid Metabolism (Acyl Carnitine)       | $-0.14 \pm 0.05$  | 3.01E-02 | Absent                 |
| eicosenoylcarnitine (C20:1)*                                                           | Fatty Acid Metabolism (Acyl Carnitine)       | $-0.12 \pm 0.05$  | 4.35E-02 | Absent                 |
| carnitine                                                                              | Carnitine Metabolism                         | $-0.04 \pm 0.02$  | 7.11E-02 | Present                |
| methylmalonate (MMA)                                                                   | Fatty Acid Metabolism (also BCAA Metabolism) | $-0.12 \pm 0.06$  | 9.19E-02 | Present                |
| palmitoleoylcarnitine (C16:1)*                                                         | Fatty Acid Metabolism (Acyl Carnitine)       | $-0.11 \pm 0.05$  | 1.07E-01 | Absent                 |

|                                    |                                        |                      |            |                               |
|------------------------------------|----------------------------------------|----------------------|------------|-------------------------------|
| docosahexaenoylcarnitine (C22:6)*  | Fatty Acid Metabolism (Acyl Carnitine) | 0.16 ± 0.08          | 1.29E-01   | Absent                        |
| oleoylcarnitine (C18:1)            | Fatty Acid Metabolism (Acyl Carnitine) | -0.07 ± 0.04         | 1.61E-01   | Absent                        |
| palmitoylcarnitine (C16)           | Fatty Acid Metabolism (Acyl Carnitine) | -0.06 ± 0.04         | 1.69E-01   | Absent                        |
| dihomo-linolenoyl-choline          | Fatty Acid Metabolism (Acyl Choline)   | -0.19 ± 0.11         | 1.69E-01   | Present                       |
| ximenoylcarnitine (C26:1)*         | Fatty Acid Metabolism (Acyl Carnitine) | -0.08 ± 0.05         | 1.70E-01   | Absent                        |
| cis-4-decenoylcarnitine (C10:1)    | Fatty Acid Metabolism (Acyl Carnitine) | 0.11 ± 0.06          | 1.75E-01   | Absent                        |
| <b>Tryptophan Metabolism (n=9)</b> |                                        |                      |            |                               |
| <b>Metabolite</b>                  | <b>Pathway</b>                         | <b>Estimate ± SE</b> | <b>FDR</b> | <b>Availability in PEAR-2</b> |
| Kynurenine                         | Tryptophan Metabolism                  | -0.15 ± 0.03         | 5.72E-05   | Present                       |
| tryptophan betaine                 | Tryptophan Metabolism                  | -0.65 ± 0.14         | 7.48E-05   | Present                       |
| N-acetylkynurenine (2)             | Tryptophan Metabolism                  | 0.59 ± 0.14          | 3.20E-04   | Present                       |
| N-formylanthranilic acid           | Tryptophan Metabolism                  | 0.37 ± 0.09          | 4.63E-04   | Absent                        |
| 5-bromotryptophan                  | Tryptophan Metabolism                  | -0.18 ± 0.05         | 1.65E-03   | Present                       |
| Serotonin                          | Tryptophan Metabolism                  | 0.36 ± 0.14          | 3.27E-02   | Present                       |
| Indolepropionate                   | Tryptophan Metabolism                  | -0.27 ± 0.11         | 5.25E-02   | Present                       |
| Indoleacetate                      | Tryptophan Metabolism                  | -0.17 ± 0.07         | 7.04E-02   | Present                       |
| Indoleacetylglutamine              | Tryptophan Metabolism                  | 0.19 ± 0.11          | 1.85E-01   | Present                       |

A positive value in the estimates indicate a higher level of that metabolite in PEAR participants with GWAA ≥ 45% than those with GWAA < 45%. A negative value in the estimates indicate a higher level of that metabolite in PEAR participants with GWAA < 45% than those with GWAA ≥ 45%. Unknown metabolites within each metabolic cluster had moderate or strong correlations with one or more of the known classified metabolites within the same cluster based on MMC approach.

Abbreviations: PEAR, Pharmacogenomic Evaluation of Antihypertensive Responses; SE, standard error; FDR, false discovery rate; GWAA, Genetic West African ancestry; MMC, modulated modularity clustering.



**Table S5. Metabolites within each of the 4 replicated metabolic clusters**

| <b>Plasmalogen &amp; Lysoplasmalogen (n=15)</b>        |                        |                      |                 |                      |                 |
|--------------------------------------------------------|------------------------|----------------------|-----------------|----------------------|-----------------|
| <b>Metabolite</b>                                      | <b>Pathway</b>         | <b>PEAR</b>          |                 | <b>PEAR-2</b>        |                 |
|                                                        |                        | <b>Estimate ± SE</b> | <b>FDR</b>      | <b>Estimate ± SE</b> | <b>FDR</b>      |
| 1-(1-enyl-stearoyl)-2-arachidonoyl-GPE (P-18:0/20:4)*  | Plasmalogen            | 0.37 ± 0.04          | 5.91E-14        | 0.31 ± 0.05          | 2.92E-07        |
| 1-(1-enyl-palmitoyl)-2-arachidonoyl-GPE (P-16:0/20:4)* | Plasmalogen            | 0.32 ± 0.04          | 4.21E-11        | 0.34 ± 0.06          | 8.14E-08        |
| 1-(1-enyl-palmitoyl)-2-arachidonoyl-GPC (P-16:0/20:4)* | Plasmalogen            | 0.23 ± 0.04          | 1.09E-08        | 0.23 ± 0.04          | 4.77E-07        |
| 1-(1-enyl-palmitoyl)-2-palmitoyl-GPC (P-16:0/16:0)*    | Plasmalogen            | 0.14 ± 0.03          | 7.67E-05        | 0.04 ± 0.04          | 3.05E-01        |
| 1-(1-enyl-palmitoyl)-2-oleoyl-GPC (P-16:0/18:1)*       | Plasmalogen            | 0.13 ± 0.03          | 1.21E-03        | 0.01 ± 0.04          | 8.74E-01        |
| 1-(1-enyl-stearoyl)-2-oleoyl-GPE (P-18:0/18:1)         | Plasmalogen            | 0.17 ± 0.05          | 1.87E-03        | 0.13 ± 0.06          | 5.07E-02        |
| 1-(1-enyl-palmitoyl)-2-linoleoyl-GPC (P-16:0/18:2)*    | Plasmalogen            | 0.12 ± 0.03          | 2.84E-03        | 0.05 ± 0.05          | 2.83E-01        |
| 1-(1-enyl-palmitoyl)-2-oleoyl-GPE (P-16:0/18:1)*       | Plasmalogen            | 0.13 ± 0.04          | 5.42E-03        | 0.12 ± 0.05          | 4.92E-02        |
| 1-(1-enyl-palmitoyl)-2-linoleoyl-GPE (P-16:0/18:2)*    | Plasmalogen            | 0.15 ± 0.05          | 8.60E-03        | 0.12 ± 0.06          | 8.86E-02        |
| 1-(1-enyl-stearoyl)-2-linoleoyl-GPE (P-18:0/18:2)*     | Plasmalogen            | 0.09 ± 0.05          | 1.35E-01        | 0.04 ± 0.06          | 5.06E-01        |
| 1-(1-enyl-stearoyl)-GPE (P-18:0)*                      | Lysoplasmalogen        | 0.19 ± 0.05          | 3.37E-03        | 0.11 ± 0.07          | 1.30E-01        |
| 1-(1-enyl-oleoyl)-GPE (P-18:1)*                        | Lysoplasmalogen        | 0.19 ± 0.06          | 9.32E-03        | 0.10 ± 0.07          | 1.93E-01        |
| 1-(1-enyl-palmitoyl)-GPE (P-16:0)*                     | Lysoplasmalogen        | 0.16 ± 0.05          | 1.32E-02        | 0.14 ± 0.06          | 4.75E-02        |
| <u>1-(1-enyl-palmitoyl)-GPC (P-16:0)*</u>              | <u>Lysoplasmalogen</u> | <u>0.09 ± 0.04</u>   | <u>1.19E-01</u> | <u>-0.05 ± 0.05</u>  | <u>3.64E-01</u> |
| X - 23587                                              | unknown                | 0.58 ± 0.10          | 9.68E-07        | 0.73 ± 0.16          | 4.16E-05        |
| <b>Sphingolipid Metabolism &amp; Ceramides (n=14)</b>  |                        |                      |                 |                      |                 |

|                                                     |                                | PEAR                              |                 | PEAR-2                             |                 |
|-----------------------------------------------------|--------------------------------|-----------------------------------|-----------------|------------------------------------|-----------------|
| Metabolite                                          | Pathway                        | Estimate $\pm$ SE                 | FDR             | Estimate $\pm$ SE                  | FDR             |
| sphingomyelin (d18:1/14:0, d16:1/16:0)*             | Sphingolipid Metabolism        | -0.18 $\pm$ 0.03                  | 7.31E-09        | -0.24 $\pm$ 0.04                   | 8.14E-08        |
| sphingomyelin (d18:2/14:0, d18:1/14:1)*             | Sphingolipid Metabolism        | -0.26 $\pm$ 0.05                  | 1.46E-06        | -0.32 $\pm$ 0.05                   | 1.84E-09        |
| sphingomyelin (d18:2/24:1, d18:1/24:2)*             | Sphingolipid Metabolism        | 0.10 $\pm$ 0.03                   | 1.33E-03        | 0.10 $\pm$ 0.03                    | 7.91E-03        |
| sphingomyelin (d18:1/18:1, d18:2/18:0)              | Sphingolipid Metabolism        | 0.10 $\pm$ 0.03                   | 2.39E-03        | 0.12 $\pm$ 0.04                    | 4.15E-03        |
| sphingomyelin (d18:1/21:0, d17:1/22:0, d16:1/23:0)* | Sphingolipid Metabolism        | -0.13 $\pm$ 0.04                  | 1.28E-02        | -0.13 $\pm$ 0.05                   | 1.07E-02        |
| <u>sphingomyelin (d18:2/16:0, d18:1/16:1)*</u>      | <u>Sphingolipid Metabolism</u> | <u>0.06 <math>\pm</math> 0.02</u> | <u>3.25E-02</u> | <u>-0.01 <math>\pm</math> 0.03</u> | <u>8.47E-01</u> |
| sphingomyelin (d18:1/20:0, d16:1/22:0)*             | Sphingolipid Metabolism        | -0.07 $\pm$ 0.03                  | 3.55E-02        | -0.07 $\pm$ 0.03                   | 6.68E-02        |
| stearoyl sphingomyelin (d18:1/18:0)                 | Sphingolipid Metabolism        | 0.07 $\pm$ 0.03                   | 4.01E-02        | 0.10 $\pm$ 0.03                    | 9.12E-03        |
| sphingomyelin (d18:1/24:1, d18:2/24:0)*             | Sphingolipid Metabolism        | 0.07 $\pm$ 0.03                   | 8.24E-02        | 0.05 $\pm$ 0.03                    | 1.30E-01        |
| palmitoyl sphingomyelin (d18:1/16:0)                | Sphingolipid Metabolism        | 0.04 $\pm$ 0.02                   | 1.16E-01        | 0.07 $\pm$ 0.03                    | 7.91E-03        |
| sphingomyelin (d18:1/20:1, d18:2/20:0)*             | Sphingolipid Metabolism        | 0.06 $\pm$ 0.03                   | 1.44E-01        | 0.09 $\pm$ 0.03                    | 1.89E-02        |
| N-palmitoyl-sphingosine (d18:1/16:0)                | Ceramides                      | -0.09 $\pm$ 0.04                  | 6.34E-02        | -0.12 $\pm$ 0.04                   | 9.27E-03        |
| X – 14939                                           | Unknown                        | 0.35 $\pm$ 0.07                   | 3.88E-06        | 0.29 $\pm$ 0.08                    | 8.54E-04        |
| X – 18901                                           | Unknown                        | -0.53 $\pm$ 0.12                  | 1.04E-04        | -0.35 $\pm$ 0.15                   | 3.45E-02        |
| <b>Cofactors and Vitamins (n=22)</b>                |                                |                                   |                 |                                    |                 |
|                                                     |                                | PEAR                              |                 | PEAR-2                             |                 |
| Metabolite                                          | Pathway                        | Estimate $\pm$ SE                 | FDR             | Estimate $\pm$ SE                  | FDR             |
| gamma-CEHC                                          | Tocopherol Metabolism          | -0.31 $\pm$ 0.08                  | 1.57E-03        | -0.41 $\pm$ 0.10                   | 8.00E-05        |
| alpha-tocopherol                                    | Tocopherol Metabolism          | -0.11 $\pm$ 0.04                  | 4.33E-02        | 0.12 $\pm$ 0.04                    | 1.37E-02        |
| gamma-CEHC glucuronide*                             | Tocopherol Metabolism          | -0.24 $\pm$ 0.10                  | 5.32E-02        | -0.14 $\pm$ 0.12                   | 2.78E-01        |
| gamma-tocopherol/beta-tocopherol                    | Tocopherol Metabolism          | 0.12 $\pm$ 0.06                   | 1.30E-01        | 0.16 $\pm$ 0.08                    | 4.92E-02        |

|                                                                      |                                        |                      |            |                      |            |
|----------------------------------------------------------------------|----------------------------------------|----------------------|------------|----------------------|------------|
| trigonelline (N'-methylnicotinate)                                   | Nicotinate and Nicotinamide Metabolism | -0.75 ± 0.14         | 1.87E-06   | -0.77 ± 0.20         | 5.43E-04   |
| N1-Methyl-2-pyridone-5-carboxamide                                   | Nicotinate and Nicotinamide Metabolism | -0.16 ± 0.06         | 2.64E-02   | -0.23 ± 0.08         | 9.33E-03   |
| 1-methylnicotinamide                                                 | Nicotinate and Nicotinamide Metabolism | -0.11 ± 0.07         | 1.99E-01   | -0.28 ± 0.10         | 1.42E-02   |
| pantothenate                                                         | Pantothenate and CoA Metabolism        | -0.22 ± 0.06         | 1.09E-03   | -0.30 ± 0.07         | 4.16E-05   |
| retinol (Vitamin A)                                                  | Vitamin A Metabolism                   | -0.14 ± 0.04         | 3.54E-03   | -0.16 ± 0.05         | 1.58E-03   |
| pyridoxate                                                           | Vitamin B6 Metabolism                  | -0.29 ± 0.10         | 1.61E-02   | -0.50 ± 0.13         | 3.23E-04   |
| X - 11485, retired for sulfate of piperine metabolite C18H21NO3 (1)* | unknown                                | 0.49 ± 0.11          | 1.01E-04   | 0.60 ± 0.15          | 2.38E-04   |
| X - 12511, retired for N-acetyl-2-aminooctanoate                     | unknown                                | 0.32 ± 0.07          | 2.87E-04   | 0.15 ± 0.09          | 1.16E-01   |
| X - 12544                                                            | unknown                                | 0.97 ± 0.24          | 7.32E-04   | 1.35 ± 0.33          | 1.99E-04   |
| X - 11452, retired for sulfate of piperine metabolite C16H19NO3 (2)* | unknown                                | 0.39 ± 0.11          | 2.40E-03   | 0.45 ± 0.16          | 8.44E-03   |
| X - 12231, retired for sulfate of piperine metabolite C16H19NO3 (3)* | unknown                                | 0.34 ± 0.11          | 8.20E-03   | 0.48 ± 0.15          | 5.17E-03   |
| X - 11852                                                            | unknown                                | 0.59 ± 0.19          | 1.12E-02   | -0.31 ± 0.30         | 3.55E-01   |
| X - 12013                                                            | unknown                                | 0.63 ± 0.24          | 3.47E-02   | 0.91 ± 0.31          | 7.91E-03   |
| X - 11850                                                            | unknown                                | 0.66 ± 0.27          | 4.89E-02   | 1.12 ± 0.34          | 3.45E-03   |
| X - 11843                                                            | unknown                                | 0.59 ± 0.26          | 6.50E-02   | 0.84 ± 0.33          | 1.89E-02   |
| X - 21849, retired for glycine conjugate of C10H14O2 (1)*            | unknown                                | 0.18 ± 0.09          | 1.35E-01   | 0.05 ± 0.10          | 6.87E-01   |
| X - 17685                                                            | unknown                                | -0.36 ± 0.19         | 1.42E-01   | -0.46 ± 0.26         | 1.07E-01   |
| X - 14662, retired for glycooursodeoxycholate sulfate (1)            | unknown                                | 0.32 ± 0.18          | 1.65E-01   | -0.26 ± 0.23         | 3.05E-01   |
| <b>Urea cycle; Arginine and Proline Metabolism (n=12)</b>            |                                        |                      |            |                      |            |
|                                                                      |                                        | <b>PEAR</b>          |            | <b>PEAR-2</b>        |            |
| <b>Metabolite</b>                                                    | <b>Pathway</b>                         | <b>Estimate ± SE</b> | <b>FDR</b> | <b>Estimate ± SE</b> | <b>FDR</b> |

|                                |                                                      |                  |          |                  |          |
|--------------------------------|------------------------------------------------------|------------------|----------|------------------|----------|
| N-delta-acetylornithine        | Urea cycle;<br>Arginine and<br>Proline<br>Metabolism | $-0.43 \pm 0.07$ | 1.29E-07 | $-0.60 \pm 0.09$ | 1.32E-08 |
| N-acetylcitrulline             | Urea cycle;<br>Arginine and<br>Proline<br>Metabolism | $0.65 \pm 0.11$  | 4.27E-07 | $0.79 \pm 0.15$  | 3.68E-06 |
| trans-4-hydroxyproline         | Urea cycle;<br>Arginine and<br>Proline<br>Metabolism | $0.31 \pm 0.05$  | 4.27E-07 | $0.24 \pm 0.06$  | 7.83E-04 |
| ornithine                      | Urea cycle;<br>Arginine and<br>Proline<br>Metabolism | $-0.16 \pm 0.03$ | 4.97E-07 | $-0.18 \pm 0.03$ | 1.32E-08 |
| homoarginine                   | Urea cycle;<br>Arginine and<br>Proline<br>Metabolism | $0.26 \pm 0.05$  | 9.68E-07 | $0.18 \pm 0.05$  | 3.06E-03 |
| N-acetylarginine               | Urea cycle;<br>Arginine and<br>Proline<br>Metabolism | $0.28 \pm 0.05$  | 2.45E-06 | $0.31 \pm 0.07$  | 3.71E-05 |
| proline                        | Urea cycle;<br>Arginine and<br>Proline<br>Metabolism | $-0.12 \pm 0.03$ | 1.15E-04 | $-0.12 \pm 0.03$ | 4.08E-04 |
| homocitrulline                 | Urea cycle;<br>Arginine and<br>Proline<br>Metabolism | $0.18 \pm 0.07$  | 2.68E-02 | $0.004 \pm 0.10$ | 9.68E-01 |
| N-acetylproline                | Urea cycle;<br>Arginine and<br>Proline<br>Metabolism | $-0.20 \pm 0.08$ | 2.78E-02 | $-0.24 \pm 0.08$ | 8.44E-03 |
| arginine                       | Urea cycle;<br>Arginine and<br>Proline<br>Metabolism | $0.07 \pm 0.03$  | 3.00E-02 | $0.08 \pm 0.03$  | 9.49E-03 |
| dimethylarginine (SDMA + ADMA) | Urea cycle;<br>Arginine and                          | $-0.05 \pm 0.02$ | 5.29E-02 | $-0.10 \pm 0.02$ | 7.67E-05 |

|                         |                                                   |                 |          |                 |          |
|-------------------------|---------------------------------------------------|-----------------|----------|-----------------|----------|
|                         | Proline Metabolism                                |                 |          |                 |          |
| N2,N5-diacetylornithine | Urea cycle;<br>Arginine and<br>Proline Metabolism | $0.18 \pm 0.09$ | 1.16E-01 | $0.01 \pm 0.10$ | 8.96E-01 |

A positive value in the estimates indicate a higher level of that metabolite in PEAR participants with GWAA  $\geq 45\%$  than those with GWAA  $< 45\%$ . A negative value in the estimates indicate a higher level of that metabolite in PEAR participants with GWAA  $< 45\%$  than those with GWAA  $\geq 45\%$ . Unknown metabolites within each metabolic cluster had moderate or strong correlations with one or more of the known classified metabolites within the same cluster based on MMC approach. The underlined metabolites are those which did not have the same direction of effect in PEAR-2 as in PEAR.

Abbreviations: PEAR, Pharmacogenomic Evaluation of Antihypertensive Responses; SE, standard error; FDR, false discovery rate; GWAA, Genetic West African ancestry; MMC, modulated modularity clustering.

**Table S6. Metabolites within replicated clusters having same direction of effect using proportion of GWAA among PEAR participants with GWAA  $\geq 45\%$  (n=250) and PEAR-2 participants with GWAA  $\geq 45\%$  (n=187)**

| Plasmalogen & Lysoplasmalogen (n=11)                   |                 |                                               |                                                 |      |                                                   |      |
|--------------------------------------------------------|-----------------|-----------------------------------------------|-------------------------------------------------|------|---------------------------------------------------|------|
|                                                        |                 |                                               | PEAR participants with GWAA $\geq 45\%$ (n=250) |      | PEAR-2 participants with GWAA $\geq 45\%$ (n=187) |      |
| Metabolite                                             | Pathway         | Direction of effect (Discovery & Replication) | Estimate $\pm$ SE                               | FDR  | Estimate $\pm$ SE                                 | FDR  |
| 1-(1-enyl-stearoyl)-2-arachidonoyl-GPE (P-18:0/20:4)*  | Plasmalogen     | Higher in participants with GWAA $\geq 45\%$  | 0.53 $\pm$ 0.24                                 | 0.34 | 0.63 $\pm$ 0.28                                   | 0.72 |
| 1-(1-enyl-palmitoyl)-2-arachidonoyl-GPE (P-16:0/20:4)* | Plasmalogen     | Higher in participants with GWAA $\geq 45\%$  | 0.44 $\pm$ 0.25                                 | 0.49 | 0.52 $\pm$ 0.30                                   | 0.72 |
| 1-(1-enyl-palmitoyl)-2-arachidonoyl-GPC (P-16:0/20:4)* | Plasmalogen     | Higher in participants with GWAA $\geq 45\%$  | 0.19 $\pm$ 0.19                                 | 0.70 | 0.30 $\pm$ 0.19                                   | 0.72 |
| 1-(1-enyl-stearoyl)-2-oleoyl-GPE (P-18:0/18:1)         | Plasmalogen     | Higher in participants with GWAA $\geq 45\%$  | 0.26 $\pm$ 0.26                                 | 0.70 | 0.10 $\pm$ 0.31                                   | 0.92 |
| 1-(1-enyl-palmitoyl)-2-oleoyl-GPE (P-16:0/18:1)*       | Plasmalogen     | Higher in participants with GWAA $\geq 45\%$  | 0.39 $\pm$ 0.22                                 | 0.49 | 0.05 $\pm$ 0.28                                   | 0.95 |
| 1-(1-enyl-palmitoyl)-2-linoleoyl-GPE (P-16:0/18:2)*    | Plasmalogen     | Higher in participants with GWAA $\geq 45\%$  | 0.24 $\pm$ 0.25                                 | 0.70 | 0.18 $\pm$ 0.33                                   | 0.92 |
| 1-(1-enyl-stearoyl)-2-linoleoyl-GPE (P-18:0/18:2)*     | Plasmalogen     | Higher in participants with GWAA $\geq 45\%$  | 0.28 $\pm$ 0.25                                 | 0.70 | 0.16 $\pm$ 0.30                                   | 0.92 |
| 1-(1-enyl-stearoyl)-GPE (P-18:0)*                      | Lysoplasmalogen | Higher in participants                        | 0.52 $\pm$ 0.30                                 | 0.49 | 0.17 $\pm$ 0.33                                   | 0.92 |

|                                                      |                            |                                                                          |                                                        |            |                                                          |            |
|------------------------------------------------------|----------------------------|--------------------------------------------------------------------------|--------------------------------------------------------|------------|----------------------------------------------------------|------------|
|                                                      |                            | with GWAA<br>≥ 45%                                                       |                                                        |            |                                                          |            |
| 1-(1-enyl-oleoyl)-GPE<br>(P-18:1)*                   | Lysoplasmalogen            | Higher in<br>participants<br>with GWAA<br>≥ 45%                          | 0.48 ± 0.34                                            | 0.69       | 0.08 ± 0.35                                              | 0.93       |
| 1-(1-enyl-palmitoyl)-<br>GPE (P-16:0)*               | Lysoplasmalogen            | Higher in<br>participants<br>with GWAA<br>≥ 45%                          | 0.51 ± 0.31                                            | 0.50       | 0.19 ± 0.33                                              | 0.92       |
| X - 23587                                            | Unknown                    | Higher in<br>participants<br>with GWAA<br>≥ 45%                          | 0.63 ± 0.52                                            | 0.70       | 0.81 ± 0.86                                              | 0.83       |
| <b>Sphingolipid Metabolism &amp; Ceramides (n=5)</b> |                            |                                                                          |                                                        |            |                                                          |            |
|                                                      |                            |                                                                          | <b>PEAR participants<br/>with AA ≥ 45%<br/>(n=250)</b> |            | <b>PEAR-2 participants<br/>with AA ≥ 45%<br/>(n=187)</b> |            |
| <b>Metabolite</b>                                    | <b>Pathway</b>             | <b>Direction of<br/>effect<br/>(Discovery<br/>&amp;<br/>Replication)</b> | <b>Estimate ±<br/>SE</b>                               | <b>FDR</b> | <b>Estimate ±<br/>SE</b>                                 | <b>FDR</b> |
| sphingomyelin<br>(d18:1/20:1,<br>d18:2/20:0)*        | Sphingolipid<br>Metabolism | Higher in<br>participants<br>with GWAA<br>≥ 45%                          | 0.15 ± 0.19                                            | 0.75       | 0.09 ± 0.19                                              | 0.92       |
| sphingomyelin<br>(d18:1/14:0,<br>d16:1/16:0)*        | Sphingolipid<br>Metabolism | Higher in<br>participants<br>with GWAA<br>< 45%                          | -0.17 ± 0.15                                           | 0.70       | -0.26 ± 0.22                                             | 0.81       |
| sphingomyelin<br>(d18:2/14:0,<br>d18:1/14:1)*        | Sphingolipid<br>Metabolism | Higher in<br>participants<br>with GWAA<br>< 45%                          | -0.29 ± 0.27                                           | 0.70       | -0.37 ± 0.26                                             | 0.80       |
| N-palmitoyl-<br>sphingosine<br>(d18:1/16:0)          | Ceramides                  | Higher in<br>participants<br>with GWAA<br>< 45%                          | -0.08 ± 0.19                                           | 0.89       | -0.47 ± 0.21                                             | 0.72       |
| X - 14939                                            | Unknown                    | Higher in<br>participants                                                | 0.64 ± 0.36                                            | 0.49       | 0.73 ± 0.40                                              | 0.72       |

|                                                           |                                        | with GWAA<br>≥ 45%                                                       |                                                        |            |                                                          |            |
|-----------------------------------------------------------|----------------------------------------|--------------------------------------------------------------------------|--------------------------------------------------------|------------|----------------------------------------------------------|------------|
| <b>Cofactors and Vitamins (n=8)</b>                       |                                        |                                                                          |                                                        |            |                                                          |            |
|                                                           |                                        |                                                                          | <b>PEAR participants<br/>with AA ≥ 45%<br/>(n=250)</b> |            | <b>PEAR-2 participants<br/>with AA ≥ 45%<br/>(n=187)</b> |            |
| <b>Metabolite</b>                                         | <b>Pathway</b>                         | <b>Direction of<br/>effect<br/>(Discovery<br/>&amp;<br/>Replication)</b> | <b>Estimate ±<br/>SE</b>                               | <b>FDR</b> | <b>Estimate ±<br/>SE</b>                                 | <b>FDR</b> |
| gamma-tocopherol/beta-tocopherol                          | Tocopherol Metabolism                  | Higher in participants with GWAA ≥ 45%                                   | 0.24 ± 0.31                                            | 0.76       | 0.16 ± 0.39                                              | 0.92       |
| alpha-tocopherol                                          | Tocopherol Metabolism                  | Higher in participants with GWAA < 45%                                   | -0.01 ± 0.30                                           | 0.99       | -0.04 ± 0.20                                             | 0.93       |
| trigonelline (N'-methylnicotinate)                        | Nicotinate and Nicotinamide Metabolism | Higher in participants with GWAA < 45%                                   | -0.13 ± 0.74                                           | 0.94       | -0.33 ± 0.97                                             | 0.92       |
| pantothenate                                              | Pantothenate and CoA Metabolism        | Higher in participants with GWAA < 45%                                   | -0.27 ± 0.33                                           | 0.75       | -0.24 ± 0.32                                             | 0.87       |
| pyridoxate                                                | Vitamin B6 Metabolism                  | Higher in participants with GWAA < 45%                                   | -0.24 ± 0.57                                           | 0.89       | -0.17 ± 0.62                                             | 0.93       |
| X - 12511, retired for N-acetyl-2-aminooctanoate          | Unknown                                | Higher in participants with GWAA ≥ 45%                                   | 0.72 ± 0.42                                            | 0.49       | 0.29 ± 0.44                                              | 0.92       |
| X - 21849, retired for glycine conjugate of C10H14O2 (1)* | Unknown                                | Higher in participants with GWAA ≥ 45%                                   | 1.03 ± 0.48                                            | 0.36       | 0.11 ± 0.53                                              | 0.93       |
| X - 11843                                                 | Unknown                                | Higher in participants                                                   | 0.81 ± 1.51                                            | 0.86       | 3.56 ± 1.99                                              | 0.72       |



|                                                          |                                                      | with GWAA<br>≥ 45%                                                       |                                                        |            |                                                          |            |
|----------------------------------------------------------|------------------------------------------------------|--------------------------------------------------------------------------|--------------------------------------------------------|------------|----------------------------------------------------------|------------|
| <b>Urea cycle; Arginine and Proline Metabolism (n=6)</b> |                                                      |                                                                          |                                                        |            |                                                          |            |
|                                                          |                                                      |                                                                          | <b>PEAR participants<br/>with AA ≥ 45%<br/>(n=250)</b> |            | <b>PEAR-2 participants<br/>with AA ≥ 45%<br/>(n=187)</b> |            |
| <b>Metabolite</b>                                        | <b>Pathway</b>                                       | <b>Direction of<br/>effect<br/>(Discovery<br/>&amp;<br/>Replication)</b> | <b>Estimate ±<br/>SE</b>                               | <b>FDR</b> | <b>Estimate ±<br/>SE</b>                                 | <b>FDR</b> |
| arginine                                                 | Urea cycle;<br>Arginine and<br>Proline<br>Metabolism | Higher in<br>participants<br>with GWAA<br>≥ 45%                          | 0.07 ± 0.14                                            | 0.89       | 0.11 ± 0.13                                              | 0.83       |
| homoarginine                                             | Urea cycle;<br>Arginine and<br>Proline<br>Metabolism | Higher in<br>participants<br>with GWAA<br>≥ 45%                          | 0.57 ± 0.26                                            | 0.34       | 0.35 ± 0.31                                              | 0.81       |
| N-acetylcitrulline                                       | Urea cycle;<br>Arginine and<br>Proline<br>Metabolism | Higher in<br>participants<br>with GWAA<br>≥ 45%                          | 1.73 ± 0.63                                            | 0.18       | 0.28 ± 0.87                                              | 0.92       |
| N-acetylarginine                                         | Urea cycle;<br>Arginine and<br>Proline<br>Metabolism | Higher in<br>participants<br>with GWAA<br>≥ 45%                          | 0.93 ± 0.32                                            | 0.18       | 0.15 ± 0.39                                              | 0.92       |
| trans-4-<br>hydroxyproline                               | Urea cycle;<br>Arginine and<br>Proline<br>Metabolism | Higher in<br>participants<br>with GWAA<br>≥ 45%                          | 0.76 ± 0.33                                            | 0.34       | 0.41 ± 0.37                                              | 0.81       |
| proline                                                  | Urea cycle;<br>Arginine and<br>Proline<br>Metabolism | Higher in<br>participants<br>with GWAA<br>< 45%                          | -0.12 ± 0.14                                           | 0.75       | -0.09 ± 0.15                                             | 0.92       |

A positive value in the estimates indicate that as proportion of GWAA increases among PEAR and PEAR-2 participants with GWAA ≥ 45%, the metabolite level increases, whereas a negative value in the estimates indicate that as proportion of GWAA increases among PEAR and PEAR-2 participants with GWAA ≥ 45%, the metabolite level decreases.

Abbreviations: PEAR, Pharmacogenomic Evaluation of Antihypertensive Responses; SE, standard error; FDR, false discovery rate; GWAA, Genetic West African ancestry.

**Figure S5. The KEGG nicotinate and nicotinamide metabolic pathway**

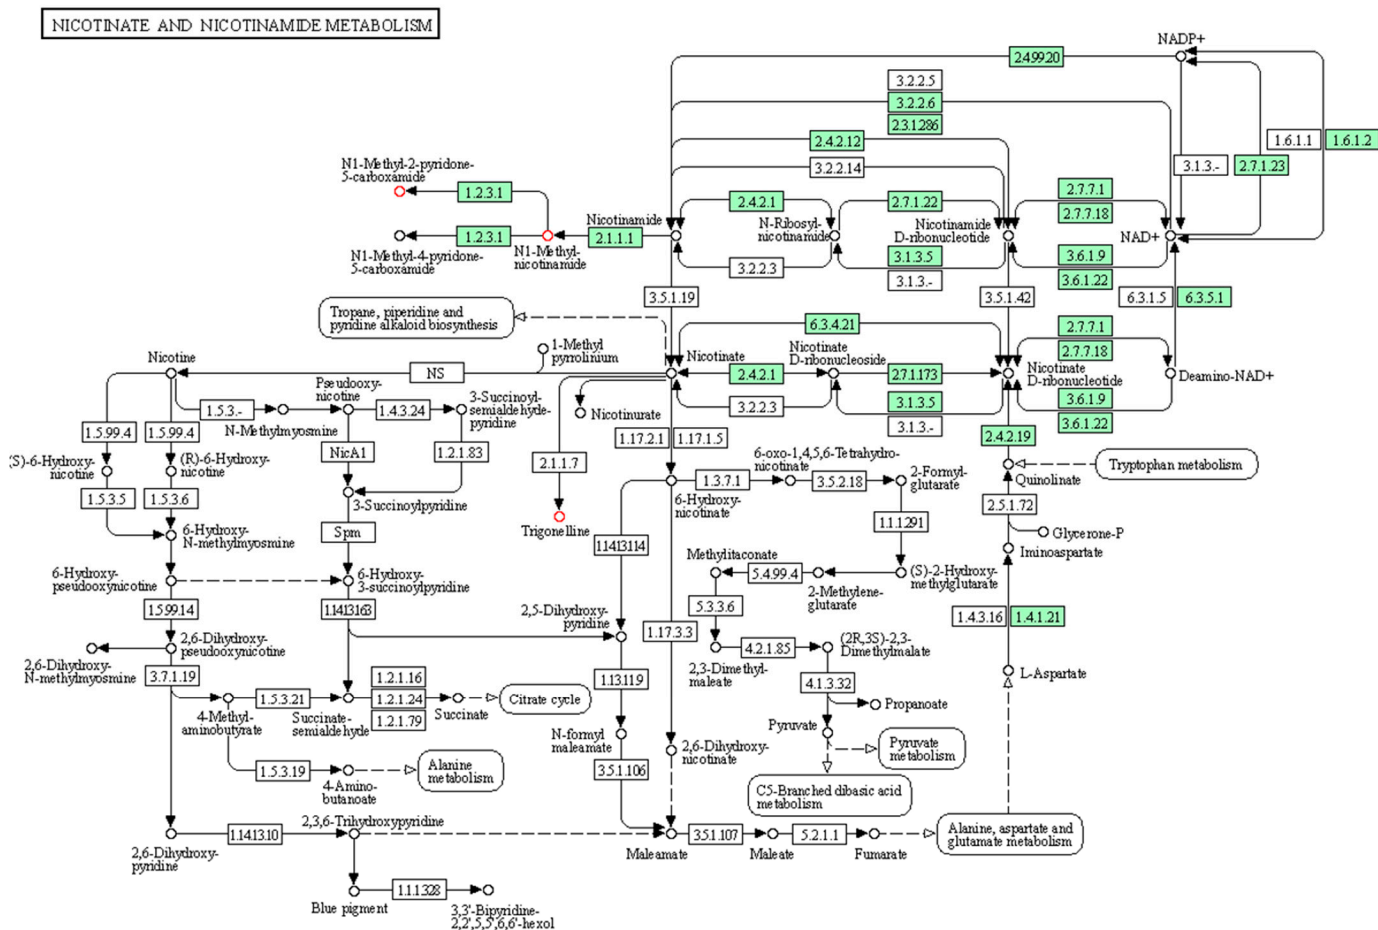

This chart represents the KEGG homo sapiens nicotinate and nicotinamide metabolism map (map00760). The metabolites circled with red are those that were included within the successfully replicated metabolic cluster (cofactors and vitamins): N1-Methyl-2-pyridone-5-carboxamide (KEGG ID C05842), 1-methylnicotinamide (KEGG ID C02918) and trigonelline (KEGG ID C01004). The 3 metabolites had higher abundance in PEAR and PEAR-2 participants with GWAA < 45%, compared to those with GWAA ≥ 45%.

Abbreviations: KEGG, Kyoto Encyclopedia of Genes and Genomes; PEAR, Pharmacogenomic Evaluation of Antihypertensive Responses; GWAA, Genetic West African ancestry.

Figure S6. The KEGG arginine and proline metabolic pathway

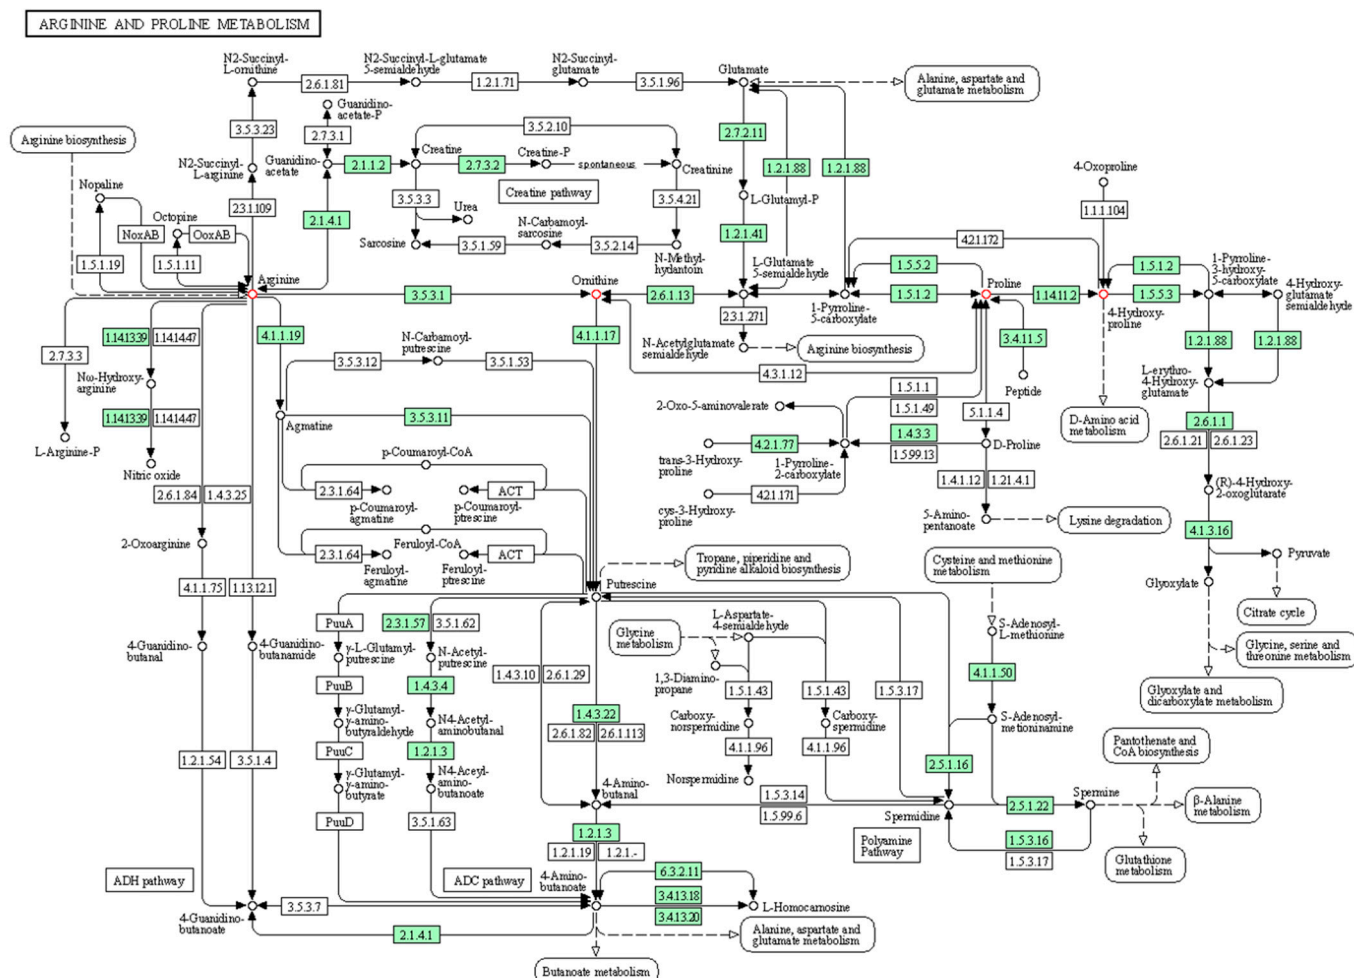

This chart represents the KEGG homo sapiens arginine and proline metabolism map (map00330). The metabolites circled with red are those that were included within the successfully replicated metabolic cluster (urea cycle; arginine and proline): arginine (KEGG ID C00062) and 4-hydroxyproline (KEGG ID C01157) had higher abundance in PEAR and PEAR-2 participants with GWAA  $\geq 45\%$  than those with GWAA  $< 45\%$ , whereas ornithine (KEGG ID C00077) and proline (KEGG ID C00148) had higher abundance in PEAR and PEAR-2 participants with GWAA  $< 45\%$  than those with GWAA  $\geq 45\%$ . The upstream gene to hydroxyproline (prolyl 4-hydroxylase subunit alpha 3 or P4HA3) (1.14.11.2) has been previously associated with systolic and diastolic blood pressure in South Asians [6].

Abbreviations: KEGG, Kyoto Encyclopedia of Genes and Genomes; PEAR, Pharmacogenomic Evaluation of Antihypertensive Responses; GWAA, Genetic West African ancestry.

**Table S7. The 84 AIMs used to estimate proportion of GWAA for each PEAR and PEAR-2 participant**

| AIM        | Chromosome | bp        | EUR_AFR |
|------------|------------|-----------|---------|
| rs2986742  | 1          | 6550376   | 0.67    |
| rs647325   | 1          | 18170886  | 0.41    |
| rs4908343  | 1          | 27931698  | 0.78    |
| rs7554936  | 1          | 151122489 | 0.65    |
| rs630101   | 1          | 236772416 | 0.85    |
| rs6003     | 1          | 197031021 | 0.62    |
| rs798443   | 2          | 7968275   | 0.80    |
| rs7421394  | 2          | 14756349  | 0.63    |
| rs4666200  | 2          | 29538411  | 0.64    |
| rs13400937 | 2          | 79864923  | 0.70    |
| rs260690   | 2          | 109579738 | 0.55    |
| rs2339475  | 2          | 29999790  | 0.78    |
| rs935925   | 2          | 237214545 | 0.77    |
| rs9809104  | 3          | 39146429  | 0.73    |
| rs6548616  | 3          | 79399575  | 0.71    |
| rs9845457  | 3          | 135914476 | 0.60    |
| rs4596126  | 3          | 13659897  | 0.73    |
| rs1039524  | 3          | 114012274 | 0.44    |
| rs10007810 | 4          | 41554364  | 0.71    |
| rs385194   | 4          | 85309078  | 0.71    |
| rs7657799  | 4          | 105375423 | 0.81    |
| rs1525760  | 4          | 117135380 | 0.83    |
| rs758973   | 4          | 13539373  | 0.73    |
| rs37369    | 5          | 35037115  | 0.58    |
| rs6451722  | 5          | 43711378  | 0.66    |
| rs6556352  | 5          | 155471714 | 0.71    |
| rs930072   | 5          | 36666071  | 0.85    |
| rs185493   | 5          | 177991258 | 0.58    |
| rs3317     | 5          | 112212151 | 0.49    |
| rs1040045  | 6          | 4747159   | 0.63    |
| rs2397060  | 6          | 51611470  | 0.68    |
| rs192655   | 6          | 90518278  | 0.36    |
| rs3024354  | 6          | 6292430   | 0.82    |
| rs3734693  | 6          | 43965165  | 0.70    |
| rs362949   | 6          | 146652354 | 0.67    |
| rs793979   | 6          | 164766576 | 0.60    |
| rs1029122  | 6          | 132250141 | 0.56    |
| rs455726   | 6          | 111699368 | 0.50    |
| rs7803075  | 7          | 130742066 | 0.71    |

|            |    |           |      |
|------------|----|-----------|------|
| rs6464211  | 7  | 151873853 | 0.72 |
| rs3176921  | 8  | 67091379  | 0.47 |
| rs285      | 8  | 19815189  | 0.43 |
| rs1408801  | 9  | 12672320  | 0.48 |
| rs913258   | 9  | 4877246   | 0.86 |
| rs2301550  | 9  | 20354796  | 0.81 |
| rs7349     | 10 | 31817905  | 0.95 |
| rs1837606  | 11 | 15838137  | 0.42 |
| rs11227699 | 11 | 66898492  | 0.48 |
| rs948028   | 11 | 120644447 | 0.68 |
| rs1042602  | 11 | 88911696  | 0.37 |
| rs2416791  | 12 | 11701488  | 0.86 |
| rs772262   | 12 | 56163734  | 0.81 |
| rs2070586  | 12 | 109277720 | 0.30 |
| rs1503767  | 12 | 118889488 | 0.64 |
| rs9530435  | 13 | 75993887  | 0.72 |
| rs9522149  | 13 | 111827167 | 0.73 |
| rs895898   | 13 | 39227547  | 0.63 |
| rs1760921  | 14 | 20818131  | 0.76 |
| rs8021730  | 14 | 67886781  | 0.65 |
| rs200354   | 14 | 99375321  | 0.51 |
| rs3784230  | 14 | 105679055 | 0.58 |
| rs179562   | 14 | 31224458  | 0.67 |
| rs8035124  | 15 | 92105708  | 0.62 |
| rs1374092  | 15 | 72808428  | 0.83 |
| rs1800404  | 15 | 28235773  | 0.79 |
| rs4984913  | 16 | 740466    | 0.68 |
| rs2269793  | 16 | 19272908  | 0.50 |
| rs7201030  | 16 | 76523792  | 0.80 |
| rs2033111  | 17 | 53788280  | 0.43 |
| rs11652805 | 17 | 62987151  | 0.84 |
| rs8082034  | 17 | 53866575  | 0.70 |
| rs2816     | 17 | 7923564   | 0.43 |
| rs2891     | 17 | 3705526   | 0.42 |
| rs7238445  | 18 | 49781544  | 0.73 |
| rs4891825  | 18 | 67867663  | 0.80 |
| rs874299   | 18 | 75056284  | 0.67 |
| rs8113143  | 18 | 33652247  | 0.68 |
| rs4436849  | 18 | 30555446  | 0.73 |
| rs3745099  | 19 | 52901905  | 0.83 |
| rs2532060  | 19 | 55614923  | 0.60 |

---

|           |    |          |      |
|-----------|----|----------|------|
| rs2835370 | 21 | 37885625 | 0.42 |
| rs2064056 | 21 | 36595108 | 0.76 |
| rs4821004 | 22 | 32366359 | 0.54 |
| rs4821667 | 22 | 37830081 | 0.83 |

The bp was based on build 37 (GRCh37). EUR\_AFR is the difference in allele frequency between the European and African populations.

Abbreviations: AIM, ancestry informative marker; GWAA, Genetic West African ancestry; PEAR, Pharmacogenomic Evaluation of Antihypertensive Responses; bp, base pair position; EUR, European; AFR, African.
